# AMERICAN PSYCHIATRIC ASSOCIATION

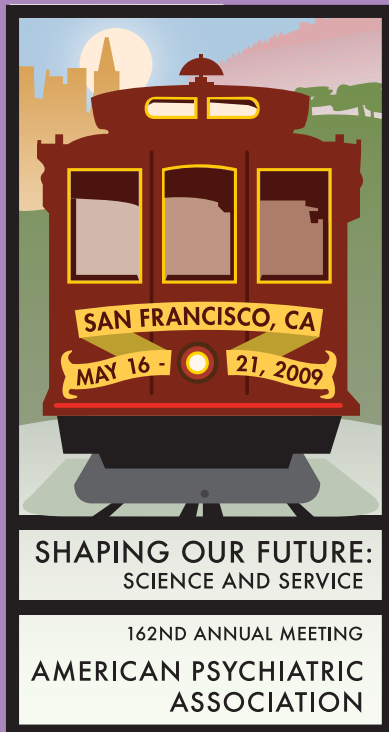

**Register Now!**

*Save the Date!*

## American Psychiatric Association 162nd Annual Meeting

May 16-21, 2008

Moscone Center • San Francisco, CA

**Join us for the premier scientific meeting of  
the year in the grand city of  
San Francisco, CA**

- Earn Up to 66 hours of *AMA PRA Category 1 Credits™*.
- World-renowned lecturers including Atul Gawande, MD, MPH, noted *New Yorker* author, surgeon, and McArthur Awardee presenting the Convocation Lecture.
- State-of-the-art clinical practice updates and cutting-edge science.
- The ever popular *Advances In* series expanded.
- Frontiers in Science, Distinguished Psychiatrists, and Presidential Symposia.
- Order access (online and/or DVD-ROM) to the 2009 Annual Meeting Online highlights at special attendee prices.

San Francisco Convention & Visitors Bureau photo.

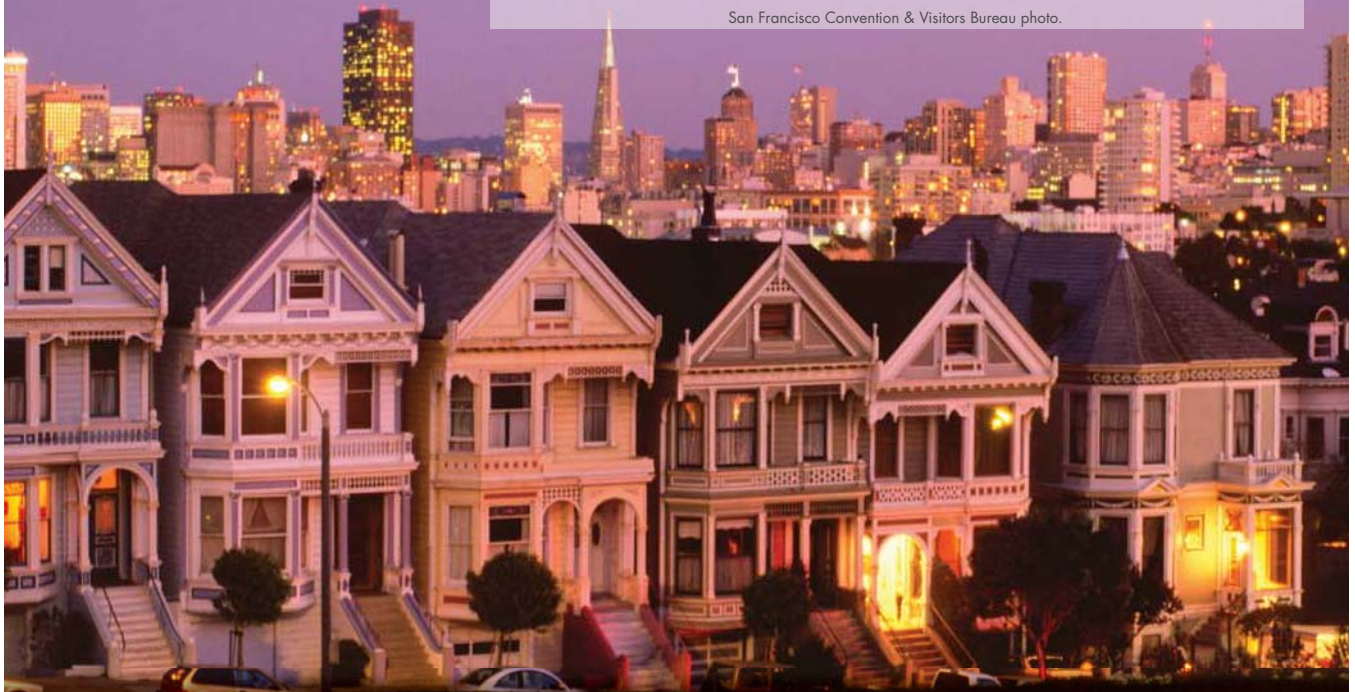

**Register online at: [www.psych.org](http://www.psych.org)**

# Special Offer for APA Members

\$84 APA Member Subscription to *Psychiatric Services*

25% off the nonmember price!

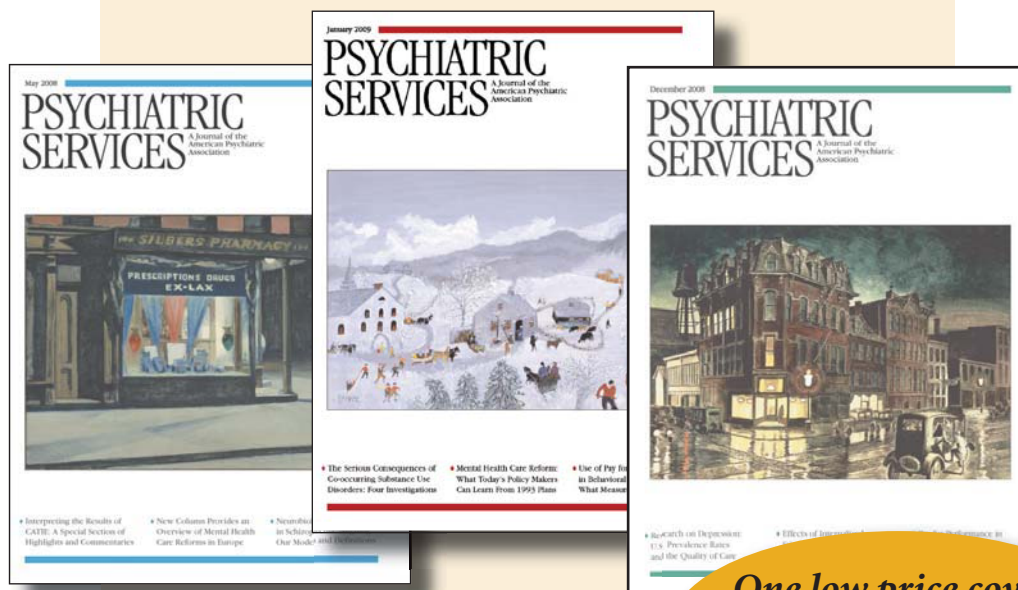

One low price covers  
your print and online  
subscription

Starting with the July 2009 issue,  
APA members will no longer receive  
*Psychiatric Services* as a free member benefit.

Each issue covers an array of topics, with a focus on people with serious mental illness:

- Evidence-based and best practices: delivering effective services and programs
- Recovery-oriented, client-centered care: how systems are being transformed
- Racial-ethnic disparities in care: how they arise and how to overcome them
- Criminal justice involvement and homelessness: diversion and housing programs
- Use of medications: improving adherence, monitoring trends and treatment adequacy
- Medicaid changes and recent court cases: what they mean for your practice

For more information or to subscribe,  
call Customer Service at 1-800-368-5777  
or visit [www.appi.org](http://www.appi.org)

Order today and make sure that you don't miss an issue!\*

\*If you currently receive *Psychiatric Services* as a free member benefit, your order for a year's subscription will be processed to begin with the July 2009 issue.

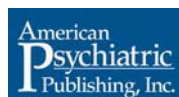

The First and Last Word in Psychiatry

Order Online: [www.appi.org](http://www.appi.org) • Toll Free: 1-800-368-5777 • Fax: 703-907-1091 • Email: [appi@psych.org](mailto:appi@psych.org)  
Priority Code AH901

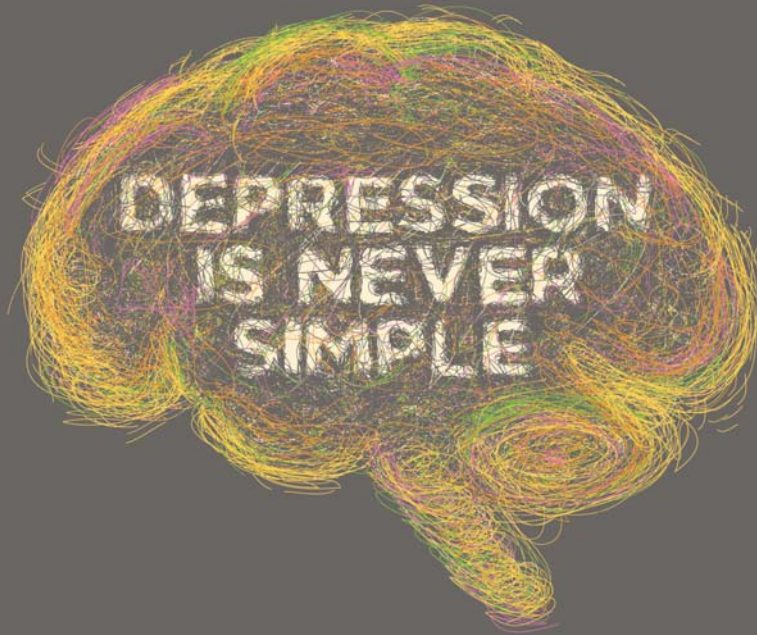

## AVAILABLE NOW: VENLAFAXINE EXTENDED RELEASE TABLETS OFFER A NEW ALTERNATIVE FOR PATIENTS WITH MAJOR DEPRESSIVE DISORDER (MDD)

### Venlafaxine Extended Release Tablets: the only way to prescribe 225 mg of extended-release, once-daily venlafaxine HCl in a single tablet<sup>1</sup>

- Equal doses of venlafaxine HCl extended-release tablets are bioequivalent to Effexor XR<sup>®</sup> (venlafaxine HCl) extended-release capsules when administered under fed conditions\*
- Venlafaxine Extended Release Tablets are not AB rated to Effexor XR
- A single 225-mg Venlafaxine Extended Release Tablet vs a combination of venlafaxine HCl extended-release capsules may reduce pill burden for patients taking 225 mg for MDD
- MDD patients should start treatment with 75 mg/day (in some patients, 37.5 mg/day for 4 to 7 days, then increased to 75 mg/day); daily dose can be increased by 75 mg/day at intervals of  $\geq 4$  days (maximum 225 mg/day)

For more information, call 1.888.299.1053 or visit [www.VERTablets.com](http://www.VERTablets.com)

\*Venlafaxine Extended Release Tablets are not indicated for the treatment of generalized anxiety disorder or panic disorder.

**Venlafaxine  
Extended Release  
Tablets** (VENLAFAXINE  
HYDROCHLORIDE)  
37.5 mg 75 mg 150 mg 225 mg

### IMPORTANT SAFETY INFORMATION

#### **WARNING: Suicidality and Antidepressants**

*See full Prescribing Information for complete boxed warning.*

**Increased risk of suicidal thinking and behavior has been reported in children, adolescents and young adults taking antidepressants for major depressive disorder (MDD) and other psychiatric disorders. Venlafaxine Extended Release Tablets are not approved for use in pediatric patients.**

Venlafaxine Extended Release Tablets (venlafaxine hydrochloride) are indicated for the treatment of Major Depressive Disorder (MDD) and Social Anxiety Disorder (SAD). Efficacy of venlafaxine HCl was shown in both short-term trials and a longer-term trial in MDD, and in short-term SAD trials. Venlafaxine Extended Release Tablets are contraindicated in patients taking monoamine oxidase inhibitors (MAOIs).

All patients should be monitored appropriately and observed closely for clinical worsening and suicidality, especially at the beginning of drug therapy, or at the time of increases or decreases in dose. Such monitoring should include daily observation by families and caregivers for emergence of agitation, irritability, unusual changes in behavior, or emergence of suicidality.

Venlafaxine Extended Release Tablets should not be used in combination with an MAOI, or within at least 14 days of discontinuing treatment with an MAOI. At least 7 days should be allowed after stopping Venlafaxine Extended Release Tablets before starting an MAOI. The development of a potentially life-threatening

serotonin syndrome may occur with Venlafaxine Extended Release Tablets, particularly if used concomitantly with serotonergic drugs (including SSRIs, SNRIs, and triptans) or with MAO inhibitors.

Treatment with venlafaxine hydrochloride is associated with sustained hypertension in some patients. Regular blood pressure monitoring is recommended. Mydriasis has been reported in association with venlafaxine; therefore, patients with raised intraocular pressure or those at risk of acute narrow-angle glaucoma should be monitored.

Dosing must be individualized according to the patient's hepatic and renal function status. Abrupt discontinuation or dose reduction has been associated with discontinuation symptoms (generally self-limiting; serious symptoms possible). A gradual reduction in the dose rather than abrupt cessation is recommended.

After treatment with venlafaxine hydrochloride, insomnia and nervousness, activation of mania/hypomania, symptomatic hyponatremia, seizures, abnormal bleeding (most commonly ecchymosis), clinically relevant increases in serum cholesterol, interstitial lung disease and eosinophilic pneumonia have been reported. Venlafaxine Extended Release Tablets should be used cautiously in patients with a history of seizures. Measurement of serum cholesterol should be considered during long-term treatment. Patients should be cautioned about the risk of bleeding associated with concomitant use of Venlafaxine Extended Release Tablets and NSAIDs, aspirin, or other drugs that affect coagulation.

Venlafaxine Extended Release Tablets should be used during pregnancy and nursing only if clearly needed due to the potential for serious adverse reactions.

Adverse reactions occurring in short-term studies of major depressive disorder\* were abnormal ejaculation, gastrointestinal complaints (nausea, dry mouth, anorexia), CNS complaints (dizziness, somnolence, abnormal dreams) and sweating. Adverse reactions occurring in short-term studies of social anxiety disorder\* were asthenia, gastrointestinal complaints (anorexia, dry mouth, nausea), CNS complaints (anxiety, insomnia, libido decreased, nervousness, somnolence, dizziness), abnormalities of sexual function (abnormal ejaculation, orgasmic dysfunction, impotence), yawn, sweating, and abnormal vision.

\*Occurring in at least 5% of patients receiving venlafaxine extended release capsules and at a rate at least twice that of placebo.

**Please see brief summary of full Prescribing Information, including complete boxed warning, on adjacent pages.**

**Reference: 1.** Venlafaxine Extended Release Tablets [package insert]. Wilmington, NC: Osmotica Pharmaceutical Corp.; 2008.

Effexor XR is a registered trademark of Wyeth.

For more information, call 1.888.299.1053 or visit [www.VERTablets.com](http://www.VERTablets.com)

©2008 Upstate Pharma, LLC. All rights reserved. Printed in USA. TA147-1008

Marketed by: For:

**UPSTATE**  
PHARMA, LLC

**Osmotica**  
Pharmaceutical.

## Venlafaxine Extended Release Tablets (venlafaxine hydrochloride)

**BRIEF SUMMARY.** See package insert for full Prescribing Information. For further product information and current package insert, please visit [www.VERTablets.com](http://www.VERTablets.com) or call our medical communications department toll-free at 1-888-299-1053.

### WARNING: SUICIDALITY AND ANTIDEPRESSANT DRUGS

**Antidepressants increased the risk compared to placebo of suicidal thinking and behavior (suicidality) in children, adolescents, and young adults in short-term studies of Major Depressive Disorder (MDD) and other psychiatric disorders. Anyone considering the use of Venlafaxine Extended Release Tablets or any other antidepressant in a child, adolescent, or young adult must balance this risk with the clinical need. Short-term studies did not show an increase in the risk of suicidality with antidepressants compared to placebo in adults beyond age 24; there was a reduction in risk with antidepressants compared to placebo in adults aged 65 or older. Depression and certain other psychiatric disorders are themselves associated with increases in the risk of suicide. Patients of all ages who are started on antidepressant therapy should be monitored appropriately and observed closely for clinical worsening, suicidality, or unusual changes in behavior. Families and caregivers should be advised of the need for close observation and communication with the prescriber. Venlafaxine Extended Release Tablets are not approved for use in pediatric patients. [See Warnings and Precautions and Patient Counseling Information in the full Prescribing Information.]**

**INDICATIONS AND USAGE:** Venlafaxine Extended Release Tablets (venlafaxine hydrochloride) are indicated for the treatment of major depressive disorder (MDD) and Social Anxiety Disorder (SAD), also known as Social Phobia, as defined by DSM-IV. Efficacy of venlafaxine in MDD was shown in both short-term trials and a longer-term trial. Efficacy in SAD was established in short-term trials. **CONTRAINDICATIONS:** Concomitant use in patients taking monoamine oxidase inhibitors (MAOIs) [see Warnings and Precautions, Potential for Interaction with Monoamine Oxidase Inhibitors]. **WARNINGS AND PRECAUTIONS: Clinical Worsening and Suicide Risk:** Patients with MDD, both adult and pediatric, may experience worsening of their depression and/or the emergence of suicidal ideation and behavior (suicidality) or unusual changes in behavior, whether or not they are taking antidepressant medications, and this risk may persist until significant remission occurs. Suicide is a known risk of depression and other psychiatric disorders, and these disorders themselves are the strongest predictors of suicide. There has been a long-standing concern, however, that antidepressants may have a role in inducing worsening of depression and the emergence of suicidality in certain patients during the early phases of treatment. Pooled analyses of short-term placebo-controlled trials of antidepressant drugs (SSRIs and others) showed that these drugs increase the risk of suicidal thinking and behavior (suicidality) in short-term studies in children and adolescents and young adults (ages 18-24) with MDD and other psychiatric disorders. Short-term studies did not show an increase in the risk of suicidality with antidepressants compared to placebo in adults beyond age 24; there was a reduction with antidepressants compared to placebo in adults aged 65 and older. The pooled analyses of placebo-controlled trials in children and adolescents with MDD, obsessive-compulsive disorder, or other psychiatric disorders included a total of 24 short-term trials of 9 antidepressant drugs in over 4400 patients. The pooled analyses of placebo-controlled trials in adults with MDD or other psychiatric disorders included a total of 295 short-term trials (median duration of 2 months) of 11 antidepressant drugs in over 77,000 patients. There was considerable variation in risk of suicidality among drugs, but a tendency toward an increase in the younger patients for almost all drugs studied. There were differences in absolute risk of suicidality across the different indications, with the highest incidence in MDD. The risk differences (drug vs placebo), however, were relatively stable within age strata and across indications. No suicides occurred in any of the pediatric trials. There were suicides in the adult trials, but the number was not sufficient to reach any conclusion about drug effect on suicide. It is unknown whether the suicidality risk extends to longer-term use, i.e., beyond several months. However, there is substantial evidence from placebo-controlled maintenance trials in adults with depression that the use of antidepressants can delay the recurrence of depression. **All patients being treated with antidepressants for any indication should be monitored appropriately and observed closely for clinical worsening, suicidality, and unusual changes in behavior, especially during the initial few months of a course of drug therapy, or at times of dose changes, either increases or decreases.** The following symptoms, anxiety, agitation, panic attacks, insomnia, irritability, hostility, aggressiveness, impulsivity, akathisia (psychomotor restlessness), hypomania, and mania, have been reported in adult and pediatric patients being treated with antidepressants for MDD as well as for other indications, both psychiatric and nonpsychiatric. Although a causal link between the emergence of such symptoms and either the worsening of depression and/or the emergence of suicidal impulses has not been established, there is concern that such symptoms may represent precursors to emerging suicidality. Consideration should be given to changing the therapeutic regimen, including possibly discontinuing the medication, in patients whose depression is persistently worse, or who are experiencing emergent suicidality or symptoms that might be precursors to worsening depression or suicidality, especially if these symptoms are severe, abrupt in onset, or were not part of the patient's presenting symptoms. If the decision has been made to discontinue treatment, medication should be tapered, as rapidly as is feasible, but with recognition that abrupt discontinuation can be associated with certain symptoms [see Dosage and Administration (2.5) and Warnings and Precautions (5.7) in the full prescribing information for a description of the risks of discontinuation of Venlafaxine Extended-Release Tablets]. **Families and caregivers of patients being treated with antidepressants for MDD or other indications, both psychiatric and nonpsychiatric, should be alerted about the need to monitor patients for the emergence of agitation, irritability, unusual changes in behavior, and the other symptoms described above, as well as the emergence of suicidality, and to report such symptoms immediately to health care providers. Such monitoring should include daily observation by families and caregivers.** Prescriptions for Venlafaxine Extended Release Tablets should be written for the smallest quantity of tablets consistent with good patient management, in order to reduce the risk of overdose. **Potential for Interaction With Monoamine Oxidase Inhibitors: Adverse reactions, some serious, have been reported in patients who recently discontinued an MAOI and started on venlafaxine hydrochloride, or who recently discontinued venlafaxine hydrochloride prior to initiation of an MAOI. These reactions included tremor, myoclonus, diaphoresis, nausea, vomiting, flushing, dizziness, hyperthermia with features resembling neuroleptic malignant syndrome, seizures, and death. Venlafaxine Extended Release Tablets should not be used in combination with an MAOI, or within at least 14 days of discontinuing treatment with an MAOI. At least 7 days should be allowed after stopping venlafaxine hydrochloride before starting an MAOI.** A major depressive episode may be the initial presentation of bipolar disorder. It is generally believed (though not established in controlled trials) that treating such an episode with an antidepressant alone may increase the likelihood of precipitation of a mixed/manic episode in patients at risk for bipolar disorder. Whether any of the symptoms described above represent such a conversion is unknown. However, prior to initiating treatment with an antidepressant, patients with depressive symptoms should be adequately screened to determine if they are at risk for bipolar disorder. It should be noted that Venlafaxine Extended Release Tablets are not approved for use in treating bipolar depression. **Serotonin Syndrome:** The development of potentially life-threatening serotonin syndrome may occur with Venlafaxine Extended Release Tablets treatment, particularly with (1) concomitant use of serotonergic drugs and (2) drugs that impair metabolism of serotonin [see WARNINGS AND PRECAUTIONS in full Prescribing Information]. If concomitant treatment of Venlafaxine Extended Release Tablets treatment, particularly with concomitant use of serotonergic drugs (including SSRIs, SNRIs and triptans) and with drugs that impair metabolism of serotonin (including MAOIs). The concomitant use of Venlafaxine Extended Release Tablets with MAOIs is contraindicated [see Contraindications (4) and Warnings and Precautions (5.2)]. If concomitant treatment of Venlafaxine Extended Release Tablets with an SSRI, an SNRI, or a 5-hydroxytryptamine receptor agonist (triptan) is clinically warranted, careful observation of the patient is advised, particularly during treatment initiation and dose increases. The concomitant use of Venlafaxine Extended Release Tablets with serotonin precursors (such as tryptophan supplements) is not recommended. **Sustained Hypertension:** Venlafaxine hydrochloride is associated with sustained dose-related increases in blood pressure (BP) in some patients. Sustained BP increases could have adverse consequences. Postmarketing cases of elevated BP requiring immediate treatment have been reported. Caution should be exercised in treating patients with pre-existing hypertension or other underlying conditions that might be compromised by BP increases. Preexisting hypertension should be controlled before Venlafaxine Extended Release Tablets therapy is initiated. It is recommended that patients receiving Venlafaxine Extended Release Tablets have regular monitoring of BP. For patients experiencing sustained increase in BP, either dose reduction or discontinuation should be considered. **Elevations in Systolic and Diastolic Blood Pressure (SBP, DBP):** In placebo-controlled premarketing studies, there were changes in mean BP. In most indications, a dose-related increase in SBP and DBP was evident. Across all trials, 1.4% of patients receiving extended-release venlafaxine hydrochloride experienced a  $\geq 15$  mm Hg increase in supine DBP with BP  $\geq 105$  mm Hg, compared to 0.9% of patients in the placebo groups. One percent of patients receiving venlafaxine hydrochloride experienced a  $\geq 20$  mm Hg increase in supine SBP with BP  $\geq 180$  mm Hg compared to 0.3% of patients in the placebo groups. **Mydriasis:** Mydriasis has been reported in association with venlafaxine

hydrochloride; patients with raised intraocular pressure or patients at risk for acute narrow-angle glaucoma should be monitored. **Discontinuation of Treatment with Venlafaxine Extended Release Tablets:** Discontinuation symptoms have been systematically evaluated in patients taking venlafaxine, to include prospective analyses of clinical trials and retrospective surveys of trials in MDD and SAD. Abrupt discontinuation or dose reduction of venlafaxine at various doses has been associated with the appearance of new symptoms, the frequency of which increased with increased dose level and longer duration of treatment. Reported symptoms include agitation, anorexia, anxiety, confusion, impaired coordination and balance, diarrhea, dizziness, dry mouth, dysphoric mood, fasciculation, fatigue, headaches, hypomania, insomnia, nausea, nervousness, nightmares, sensory disturbances (including shock-like electrical sensations), somnolence, sweating, tinnitus, tremor, vertigo, and vomiting. During marketing of venlafaxine hydrochloride extended-release capsules, other SNRIs, and SSRIs, there have been spontaneous reports of adverse reactions occurring upon discontinuation of these drugs, particularly when abrupt, including the following: dysphoric mood, irritability, agitation, dizziness, sensory disturbances (e.g., paresthesias), anxiety, confusion, headache, lethargy, emotional lability, insomnia, hypomania, tinnitus, and seizures. While these reactions are generally self-limiting, there have been reports of serious discontinuation symptoms. Patients should be monitored for these symptoms when discontinuing treatment. A gradual reduction in the dose rather than abrupt cessation is recommended whenever possible. If intolerable symptoms occur following a decrease in the dose or upon discontinuation of treatment, then resuming the previously prescribed dose may be considered. Subsequently, the physician may continue decreasing the dose but at a more gradual rate [see Dosage and Administration (2.4) in full prescribing information]. **Insomnia and Nervousness:** Treatment-emergent insomnia and nervousness were more commonly reported for patients treated with venlafaxine hydrochloride extended-release capsules than with placebo in pooled analyses of short-term MDD and other clinical studies, as shown in Table 5 in the full prescribing information. **Changes in Weight:** In some placebo-controlled trials in MDD, 4% of the patients treated with venlafaxine hydrochloride extended-release capsules and 1% of the placebo-treated patients sustained a loss of 7% or more of body weight during up to 6 months of treatment. The safety and efficacy of venlafaxine therapy in combination with weight loss agents have not been established. Co-administration of Venlafaxine Extended Release Tablets and weight loss agents is not recommended. Venlafaxine Extended Release Tablets are not indicated for weight loss alone or in combination with other products. **Changes in Height: Pediatric Patients:** In the six-month, open-label MDD study, children and adolescents had height increases that were less than expected based on data from age- and sex-matched peers. The difference between observed growth rates and expected growth rates was larger for children (<12 years old) than for adolescents ( $\geq 12$  years old). **Changes in Appetite: Adult Patients:** Treatment-emergent anorexia was more commonly reported for patients treated with venlafaxine hydrochloride extended-release capsules than for placebo-treated patients in the pool of short-term, double-blind, placebo-controlled MDD (8% vs 4%) and SAD (20% vs 2%) studies. Pediatric Patients: In placebo-controlled trials in MDD and another disorder, 10% of patients aged 6-17 treated with venlafaxine hydrochloride extended-release capsules for up to eight weeks and 3% of patients treated with placebo reported treatment-emergent anorexia. **Activation of Mania/Hypomania:** Mania or hypomania occurred during MDD studies in 0.3% of patients treated with extended-release venlafaxine compared with 0% of placebo patients. With immediate release venlafaxine, the rate was 0.5% compared with 0% of placebo patients. No reports of mania or hypomania were reported in trials with SAD. As with all drugs effective in the treatment of MDD, Venlafaxine Extended Release Tablets should be used cautiously in patients with a history of mania. **Hypонатremia:** Hyponatremia may occur as a result of treatment with SSRIs and SNRIs, including Venlafaxine Extended Release Tablets. In many cases, this hyponatremia appears to be the result of the syndrome of inappropriate antidiuretic hormone secretion (SIADH). Cases with serum sodium lower than 110 mmol/L have been reported. Elderly patients may be at greater risk of developing hyponatremia with SSRIs and SNRIs. Also, patients taking diuretics or who are otherwise volumes depleted may be at greater risk [see Use in Specific Populations (6.5) in full prescribing information]. Discontinuation of Venlafaxine Extended Release Tablets should be considered in patients with symptomatic hyponatremia, and appropriate medical intervention should be instituted. **Seizures:** In all premarketing venlafaxine hydrochloride MDD trials, seizures were reported in 0.3% of venlafaxine hydrochloride-treated patients. Venlafaxine Extended Release Tablets should be used cautiously in patients with a history of seizures and should be discontinued in any patient who develops seizures. **Abnormal Bleeding:** SSRIs and SNRIs, including Venlafaxine Extended Release Tablets, may increase the risk of bleeding events. Concomitant use of aspirin, nonsteroidal anti-inflammatory drugs (NSAIDs), warfarin, and other anticoagulants may add to this risk. Bleeding events related to SSRIs and SNRIs use have ranged from ecchymoses, hematomas, epistaxis, and petechiae to life-threatening hemorrhages. Patients should be cautioned about the risk of bleeding associated with the concomitant use of Venlafaxine Extended Release Tablets and other drugs that affect coagulation. **Serum Cholesterol Elevation:** Clinically relevant increases in serum cholesterol were recorded in 5.3% of venlafaxine hydrochloride-treated patients and 0.0% of patients receiving placebo for at least 3 months in trials. Measurement of serum cholesterol levels should be considered during long-term treatment. **Interstitial Lung Disease and Eosinophilic Pneumonia:** Interstitial lung disease and eosinophilic pneumonia associated with venlafaxine therapy have been rarely reported. The possibility of these adverse reactions should be considered in venlafaxine-treated patients who present with progressive dyspnea, cough, or chest discomfort. Such patients should undergo prompt medical evaluation, and discontinuation of venlafaxine therapy should be considered. **Use in Patients with Heart Disease:** Premarketing experience with venlafaxine in patients with concomitant systemic illness is limited. Caution is advised in administering Venlafaxine Extended Release Tablets to patients with diseases or conditions that could affect hemodynamic responses. Venlafaxine has not been evaluated or used to any appreciable extent in patients with a recent history of myocardial infarction or unstable heart disease. Patients with these diagnoses were systematically excluded from many clinical studies during venlafaxine's premarketing testing. As increases in heart rate (mean increase of 4 beats per minute in MDD trials and 5 beats per minute in SAD trials) were observed, caution should be exercised in patients whose underlying medical conditions might be compromised by increases in heart rate (e.g., patients with hyperthyroidism, heart failure, or recent myocardial infarction). **ADVERSE REACTIONS: Clinical Studies Experience: Short-Term, Placebo-Controlled Trials: Adverse Events Leading to Discontinuation of Treatment:** Approximately 11% of the 357 patients who received venlafaxine hydrochloride extended-release capsules in MDD trials discontinued treatment due to an adverse reaction (vs 6% of the 285 placebo-treated patients). Adverse reactions that led to treatment discontinuation in at least 2% of drug-treated patients were nausea, dizziness and somnolence. Approximately 17% of the 277 patients in SAD trials who received venlafaxine hydrochloride extended-release capsules discontinued treatment due to an adverse reaction (vs 5% of the 274 placebo-treated patients). Adverse reactions that led to treatment discontinuation in at least 2% of drug-treated patients were nausea, insomnia, impotence, headache, dizziness and somnolence. **Adverse Events Occurring at an Incidence of 5% or More: Major Depressive Disorder:** Note in particular the following adverse reactions that occurred in at least 5% of the patients receiving venlafaxine hydrochloride extended-release capsules and at a rate at least twice that of the placebo group for all placebo-controlled trials for the MDD indication (see Table 6): Abnormal ejaculation, gastrointestinal complaints (nausea, dry mouth, and anorexia), CNS complaints (dizziness, somnolence, and abnormal dreams), and sweating. In the two U.S. placebo-controlled trials, the following additional reactions occurred in at least 5% of patients treated with venlafaxine hydrochloride extended-release capsules (n = 192) and at a rate at least twice that of the placebo group: Abnormalities of sexual function (impotence in men, anorgasmia in women, and libido decreased), gastrointestinal complaints (constipation and flatulence), CNS complaints (insomnia, nervousness, and tremor), problems of special senses (abnormal vision), cardiovascular effects (hypertension and vasodilation), and yawning. **Social Anxiety Disorder:** Note in particular the following adverse reactions that occurred in at least 5% of the patients receiving venlafaxine hydrochloride extended-release capsules and at a rate at least twice that of the placebo group for the 2 placebo-controlled trials for the SAD indication (see Table 7): Asthenia, gastrointestinal complaints (anorexia, constipation, dry mouth, nausea), CNS complaints (dizziness, insomnia, libido decreased, nervousness, somnolence), abnormalities of sexual function (abnormal ejaculation, impotence, libido decreased, orgasmic dysfunction), yawn, sweating, and abnormal vision. **Adverse Events Occurring at an Incidence of 2% or More:** MDD and SAD trials included patients receiving venlafaxine hydrochloride extended-release capsules in doses ranging from 75 mg to 225 mg/day for up to 12 weeks. The prescriber should be aware that the following adverse reactions figures cannot be used to predict the incidence of adverse reactions in the course of usual medical practice. Similarly, the cited frequencies cannot be compared with figures obtained from other clinical investigations involving different treatments, uses, and investigators. The cited figures, however, do provide the prescribing physician with some basis for estimating the relative contribution of drug and non-drug factors to adverse reaction incidence rate in the population studied. [See TABLE 6 in full Prescribing Information.] **TABLE 6: Treatment Emergent Adverse Reaction Incidence in Short-Term Placebo-Controlled Clinical Trials with Venlafaxine Hydrochloride Extended-Release Capsules in Patients with Major Depressive Disorder.** This table reports adverse events that occurred in 2% or more of patients treated with venlafaxine hydrochloride extended-release capsules where the incidence in patients treated with venlafaxine hydrochloride extended-release capsules (n=357) was greater than the incidence for the respective placebo-treated patients (n=285). For each adverse reaction, the incidence of reactions in the drug-treated patients is listed before the incidence in placebo-treated patients. **Body as a Whole:** Asthenia (8% and 7%). **Cardiovascular System:** Vasodilation (4% and 2%); Hypertension (4% and 1%). **Digestive System:** Nausea (31% and 7%); Constipation (8% and 5%); Anorexia (8% and 4%); Vomiting (4% and 2%); Flatulence (4% and 3%). **Metabolic/Nutritional:** Weight Loss (3% and 0%). **Nervous System:** Dizziness (20% and 9%);

Somnolence (17% and 8%) Insomnia (17% and 11%); Dry mouth (12% and 6%); Nervousness (10% and 5%); Abnormal Dreams (7% and 2%); Tremor (5% and 2%); Depression (3% and <1%); Paresthesia (3% and 1%); Libido Decreased (3% and <1%); Agitation (3% and 1%). **Respiratory System:** Pharyngitis (7% and 6%); Yawn (3% and 0%). **Skin:** Sweating (14% and 3%). **Special Senses:** Abnormal vision (4% and <1%). **Urogenital System:** Abnormal ejaculation (16% and <1%); Impotence (4% and <1%); Female anorgasmia (3% and <1%). [See TABLE 7 in full Prescribing Information]. **TABLE 7: Treatment Emergent Adverse Reaction Incidence in Short-Term Placebo-Controlled Clinical Trials with Venlafaxine Hydrochloride Extended-Release Capsules in Patients with Social Anxiety Disorder.** This table reports adverse events that occurred in 2% or more of patients treated with venlafaxine hydrochloride extended-release capsules where the incidence in patients treated with venlafaxine hydrochloride extended-release capsules (n=277) was greater than the incidence for the respective placebo-treated patients (n=274). For each adverse reaction, the incidence of reactions in the drug-treated patients is listed before the incidence in placebo-treated patients. **Body as a Whole:** Headache (34% and 33%); Asthenia (17% and 8%); Flu Syndrome (6% and 5%); Accidental Injury (5% and 3%); Abdominal Pain (4% and 3%). **Cardiovascular System:** Hypertension (5% and 4%); Vasodilation (3% and 1%); Palpitation (3% and 1%). **Digestive System:** Nausea (29% and 9%); Anorexia (20% and 1%); Constipation (8% and 4%); Diarrhea (6% and 5%); Vomiting (3% and 2%); Eructation (2% and 0%). **Metabolic/Nutritional:** Weight Loss (4% and 0%). **Nervous System:** Insomnia (23% and 7%); Dry mouth (17% and 4%); Dizziness (16% and 8%); Somnolence (16% and 8%); Nervousness (11% and 3%); Libido Decreased (9% and <1%); Anxiety (5% and 3%); Agitation (4% and 1%); Tremor (4% and <1%); Abnormal Dreams (4% and <1%); Paresthesia (3% and <1%); Twitching (2% and 0%). **Respiratory System:** Yawn (5% and <1%); Sinusitis (2% and 1%). **Skin:** Sweating (13% and 2%). **Special Senses:** Abnormal vision (6% and 3%). **Urogenital System:** Abnormal ejaculation (16% and 1%); Impotence (10% and 1%); Female Orgasmic Dysfunction (8% and 0%). **Vital Sign Changes:** Venlafaxine hydrochloride was associated with a mean increase in pulse rate of 4 beats/min in SAD trials. In premarketing trials, the mean change from baseline heart rate for patients treated with extended-release venlafaxine hydrochloride in MDD and SAD trials was 4 beats-per-minute and 5 beats-per-minute, respectively. In a flexible-dose study with doses ranging from 200 mg to 375 mg/day, patients receiving extended-release venlafaxine hydrochloride had a mean increase in heart rate of 8.5 beats-per-minute [see WARNINGS AND PRECAUTIONS in full Prescribing Information for effects on heart rate and blood pressure]. **Laboratory Changes:** Clinically relevant increases in serum cholesterol were noted in venlafaxine hydrochloride clinical trials. Increases were duration dependent over the study period and tended to be greater with higher doses. **ECG Changes:** In a flexible-dose MDD study with doses of venlafaxine hydrochloride immediate-release tablets in the range of 200 to 375 mg/day and mean dose greater than 300 mg/day, the mean change in heart rate was 8.5 beats per minute compared with 1.7 beats per minute for placebo. [See Warnings and Precautions (5.1.7)]. **POSTMARKETING EXPERIENCE:** Voluntary reports of other adverse reactions temporally associated with the use of venlafaxine have been received since market introduction. Because these reactions have been reported from a population of uncertain size, it is not always possible to reliably estimate their frequency or establish a causal relationship to drug exposure. These reports include the following reactions: agranulocytosis, anaphylaxis, aplastic anemia, cataplexy, congenital anomalies, impaired coordination and balance, CPK increased, deep vein thrombophlebitis, delirium, EKG abnormalities such as QT prolongation; cardiac arrhythmias including atrial fibrillation, supraventricular tachycardia, ventricular extrasystoles, and rare reports of ventricular fibrillation and ventricular tachycardia, including torsades de pointes; epidermal necrolysis/Stevens-Johnson syndrome, erythema multiforme, extrapyramidal symptoms (including dyskinesia and tardive dyskinesia), angle-closure glaucoma, hemorrhage (including eye and gastrointestinal bleeding), hepatic reactions (including GGT elevation; abnormalities of unspecified liver function tests; liver damage, necrosis, or failure; and fatty liver), interstitial lung disease, involuntary movements, LDH increased, neuroleptic malignant syndrome-like reactions (including a case of a 10-year-old who may have been taking methylphenidate, was treated and recovered), neutropenia, night sweats, pancreatitis, pancytopenia, panic, prolactin increased, renal failure, rhabdomyolysis, serotonin syndrome, shock-like electrical sensations or trinitus (in some cases, subsequent to the discontinuation of venlafaxine or tapering of dose), and syndrome of inappropriate antidiuretic hormone secretion (usually in the elderly). **DRUG INTERACTIONS: Alcohol:** The effect of alcohol on plasma levels of Venlafaxine Extended Release Tablets is not known. **Cimetidine:** Use caution when administering venlafaxine hydrochloride with cimetidine to patients with preexisting hypertension or hepatic dysfunction, and the elderly. **Diazepam:** A single dose of diazepam did not appear to affect the PK of either venlafaxine hydrochloride (150 mg/day) or its major active metabolite, O-desmethylvenlafaxine (ODV). Venlafaxine hydrochloride did not have any effect on the PK of diazepam or its active metabolite, desmethyl-diazepam, or affect the psychomotor and psychometric effects induced by diazepam. **Haloperidol:** Venlafaxine hydrochloride (150 mg/day) decreased total oral-dose clearance of haloperidol, resulting in a 70% increase in haloperidol AUC. The haloperidol C<sub>max</sub> increased 88%, but the haloperidol elimination t<sub>1/2</sub> was unchanged. **Lithium:** A single dose of lithium (600 mg) did not appear to affect the PK of either venlafaxine hydrochloride (150 mg/day) or ODV. Venlafaxine hydrochloride had no effect on the PK of lithium. **Drugs Highly Bound to Plasma Proteins:** Venlafaxine hydrochloride is not highly bound to plasma proteins; coadministration of Venlafaxine Extended Release Tablets and a highly protein-bound drug should not cause increased free concentrations of the other drug. **Drugs That Inhibit Cytochrome P450 Isoenzymes:** CYP2D6 and CYP3A4 Inhibitors: Venlafaxine hydrochloride is metabolized to ODV by CYP2D6. Drugs inhibiting this isoenzyme have the potential to increase plasma concentrations of venlafaxine hydrochloride and decrease those of ODV. Because venlafaxine hydrochloride and ODV are approximately equiactive and equipotent, no dosage adjustment is required when venlafaxine hydrochloride is coadministered with a CYP2D6 inhibitor. Pharmacokinetic studies with ketoconazole in both poor and extensive metabolizers of CYP2D6 resulted in higher plasma concentrations and AUCs of both venlafaxine hydrochloride and ODV in most subjects following administration of ketoconazole. Concomitant use of CYP3A4 inhibitors and venlafaxine hydrochloride may increase levels of both venlafaxine hydrochloride and ODV. Use caution if therapy includes venlafaxine hydrochloride and any CYP3A4 inhibitor. **Drugs Metabolized by Cytochrome P450 Isoenzymes:** Venlafaxine hydrochloride is a relatively weak inhibitor of CYP2D6 in vitro. Imipramine: Venlafaxine hydrochloride did not affect the PK of imipramine or 2-OH-imipramine. However, desipramine AUC, C<sub>max</sub>, and C<sub>min</sub> increased by about 35% in the presence of venlafaxine hydrochloride. The 2-OH-desipramine AUCs increased by 2.5 to 4.5 fold (with venlafaxine hydrochloride doses of up to 75 mg q 12h). The clinical significance of elevated 2-OH-desipramine is unknown. Imipramine did not affect the PK of venlafaxine hydrochloride and ODV. Metoprolol: Venlafaxine hydrochloride (50 mg q 8h for 5 days) appeared to reduce the blood-lowering effect of metoprolol (100 mg q 24h for 5 days) in one study. Caution should be exercised when these drugs are given together. Risperidone: Venlafaxine hydrochloride (150 mg/day) slightly inhibited metabolism of a single 1-mg dose of risperidone, resulting in an about 32% increase in risperidone AUC. Venlafaxine hydrochloride coadministration did not significantly alter the PK profile of the total active moiety (risperidone plus its metabolite 9-hydroxyrisperidone). CYP3A4: Venlafaxine hydrochloride did not inhibit CYP3A4 in vitro or in vivo. Indinavir: In healthy volunteers, venlafaxine hydrochloride (150 mg/day) resulted in a 28% decrease in the AUC of a single dose of a single 800-mg dose of indinavir and a 36% decrease in indinavir C<sub>max</sub>. Indinavir did not affect the PK of venlafaxine hydrochloride and ODV. CYP1A2: Venlafaxine hydrochloride did not inhibit CYP1A2 in vitro or in vivo. CYP2C9: Venlafaxine hydrochloride did not inhibit CYP2C9 in vitro. In vivo, venlafaxine hydrochloride 75 mg (75 mg q 12h) did not alter the PK of a single 550-mg dose of tolbutamide or the CYP2C9-mediated formation of 4-OH-tolbutamide. CYP2C19: Venlafaxine hydrochloride did not inhibit the metabolism of diazepam, which is partially metabolized by CYP2C19 (see Diazepam above). **MAOIs:** [See CONTRAINDICATIONS and WARNINGS AND PRECAUTIONS in full Prescribing Information.] **Other CNS-Active Drugs:** Caution is advised if there is concomitant use of venlafaxine and other CNS-active drugs. Serotonergic Drugs and Triptans: Based on the mechanism of action of Venlafaxine Extended Release Tablets and the potential for serotonin syndrome, caution is advised when Venlafaxine Extended Release Tablets are coadministered with other drugs that may affect the serotonergic neurotransmitter systems, such as triptans, SSRIs, other SNRIs, linezolid, lithium, tramadol, or St. John's Wort. If concomitant treatment of Venlafaxine Extended Release Tablets with these drugs is warranted, careful observation of the patient is advised, particularly during treatment initiation and dose increases. Concomitant use of Venlafaxine Extended Release Tablets with tryptophan supplements is not recommended [see WARNINGS AND PRECAUTIONS in full Prescribing Information]. There have been rare postmarketing reports of serotonin syndrome with use of an SSRI and a triptan. If concomitant use of Venlafaxine Hydrochloride Extended Release tablets with a triptan is warranted, careful observation of the patient is advised, particularly during treatment initiation and dose increases [see WARNINGS AND PRECAUTIONS in full Prescribing Information]. **Drugs That Interfere With Hemostasis:** Interference with serotonin reuptake may affect platelet function and result in bleeding. Concurrent use of NSAIDs or aspirin may increase this risk. Increases in prothrombin time (PT), partial thromboplastin time (PTT), or INR have been reported when venlafaxine hydrochloride was given to patients on warfarin therapy. Patients on warfarin should be carefully monitored when Venlafaxine Extended Release Tablets are begun or discontinued. **Electroconvulsive Therapy:** There is no clinical data establishing the benefit of electroconvulsive therapy combined with Venlafaxine Hydrochloride Extended Release Tablets. **Postmarketing Spontaneous Drug Interaction Reports:** There have been reports of elevated clozapine levels temporally associated with adverse reactions, including seizures, following the addition of venlafaxine. There have been reports of increases in PT, PTT, or INR when venlafaxine was given to patients also receiving warfarin. **USE IN SPECIFIC POPULATIONS: Pregnancy: Teratogenic Effects: Pregnancy Category C:** There are no adequate and well-controlled studies of venlafaxine in pregnant women.

Venlafaxine Extended Release Tablets should be used during pregnancy only if clearly needed. **Non-Teratogenic Effects:** Neonates exposed to venlafaxine hydrochloride late in the third trimester have developed complications requiring prolonged hospitalization, respiratory support, and tube feeding. Complications can arise immediately upon delivery. Reports include respiratory distress, cyanosis, apnea, seizures, unstable temperature, feeding difficulty, vomiting, hypoglycemia, hypo- and hypertonia, hyperreflexia, tremor, jitteriness, irritability, and constant crying. This is consistent with a toxic effect of SSRIs or SNRIs or a drug discontinuation syndrome. In some cases, it is consistent with serotonin syndrome. When treating a pregnant woman with Venlafaxine Extended Release Tablets during the third trimester, carefully consider the potential risks and benefits of treatment. **Labor and Delivery:** The effect of venlafaxine hydrochloride on labor and delivery in humans is unknown. **Nursing Mothers:** Venlafaxine hydrochloride and ODV, its active metabolite, are excreted in human milk. Because of the potential for serious adverse reactions in nursing infants, a decision should be made whether to discontinue nursing or to discontinue Venlafaxine Extended Release Tablets, taking into account the importance of the drug to the mother. **Pediatric Use:** Safety and effectiveness in the pediatric population have not been established [see BOXED WARNING and Warnings and Precautions: Clinical Worsening and Suicide Risk]. Anyone considering using Venlafaxine Extended Release Tablets in a child or adolescent must balance the potential risks with the clinical need. While no studies have adequately assessed the impact of venlafaxine hydrochloride on growth, development, and maturation of children and adolescents, studies suggest it may adversely affect weight and height [see WARNINGS AND PRECAUTIONS: General: Changes in Height and Changes in Weight in full Prescribing Information]. Should the decision be made to treat a pediatric patient with Venlafaxine Extended Release Tablets, regular monitoring of weight and height is recommended during treatment, particularly if long term. The safety of venlafaxine hydrochloride in pediatric patients has not been assessed for treatment beyond 6 months. In patients aged 6-17, clinically relevant blood pressure and cholesterol increases were similar to those observed in adult patients. The precautions for adults apply to pediatric patients. **Geriatric Use:** While no overall differences in effectiveness or safety were observed between geriatric and younger patients, greater sensitivity of some older individuals cannot be ruled out. The elderly may be at greater risk for significant hyponatremia. No dose adjustment is recommended based on age alone. **Patients With Hepatic Impairment:** Decreased clearance was noted in patients with cirrhosis. A lower dose may be necessary in these patients; extra caution should be used in these patients. **Patients With Renal Impairment:** In patients with GFR = 10 to 70 mL/min, clearance of venlafaxine hydrochloride and its metabolites were decreased. It is recommended that total daily dose of Venlafaxine Extended Release Tablets be reduced by 25% to 50% in these patients. Individualization of dosage may be desirable in some patients. In hemodialysis patients, it is recommended that total daily dose be reduced by 50%. Venlafaxine Extended Release Tablets should be used with caution in such patients. **DRUG ABUSE AND DEPENDENCE:** Venlafaxine Extended Release Tablets are not a controlled substance. Carefully evaluate patients for history of drug abuse and observe such patients closely for signs of misuse or abuse of venlafaxine hydrochloride. Discontinuation effects have been reported in patients receiving venlafaxine hydrochloride [see WARNINGS AND PRECAUTIONS; and DOSAGE AND ADMINISTRATION in full Prescribing Information]. **OVERDOSAGE:** In postmarketing experience, overdosage has occurred predominantly in combination with alcohol and/or other drugs. The most commonly reported reactions include tachycardia, changes in consciousness, mydriasis, seizures, and vomiting. Electrocardiogram changes (eg, prolongation of QT interval, bundle branch block, QRS prolongation), ventricular tachycardia, bradycardia, hypotension, rhabdomyolysis, liver, lung necrosis, serotonin syndrome, and death have been reported. Ensure an adequate airway, oxygenation, and ventilation. Monitor cardiac rhythm and vital signs. General supportive and symptomatic measures are also recommended. Induction of emesis is not recommended. Gastric lavage with a large-bore orogastric tube with appropriate airway protection, if needed, may be indicated if performed soon after ingestion or in symptomatic patients. Activated charcoal should be administered. Due to the large volume of distribution of this drug, forced diuresis, dialysis, hemoperfusion, and exchange transfusion are unlikely to be of benefit. No specific antidotes for venlafaxine hydrochloride are known. In managing overdosage, consider the possibility of multiple drug involvement. Consider contacting a poison control center for additional information on treatment. Telephone numbers for certified poison control centers are listed in the Physicians' Desk Reference® (PDR®). **DOSAGE AND ADMINISTRATION:** Consult full prescribing information for dosing instructions. **Switching Patients to or from an MAOI: At least 14 days should elapse between discontinuation of an MAOI and initiation of therapy with Venlafaxine Extended Release Tablets. At least 7 days should be allowed after stopping Venlafaxine Extended Release Tablets before starting an MAOI** [see WARNINGS AND PRECAUTIONS in full Prescribing Information].

To report SUSPECTED ADVERSE REACTIONS, contact Upstate Pharma, LLC Pharmaceutical Corp. at 1-888-299-1053 or FDA at 1-800-FDA-1088 or [www.fda.gov/medwatch](http://www.fda.gov/medwatch).

This brief summary is based on Venlafaxine Extended Release Tablets Prescribing Information, August 2008. Osmotica Pharmaceutical Corp.

Marketed by Upstate Pharma, LLC, Rochester, NY 14623 for Osmotica Pharmaceutical, Wilmington, NC 28405.

©2008, Osmotica Pharmaceutical Corp., Wilmington, NC 28405, USA T1047-1208

1E 08/2008



Realize the possibilities...

*Jerome, 41  
Real patient,  
Peer specialist*

Diagnosis: schizophrenia

- Effectively treats the symptoms of schizophrenia
- Well-established tolerability profile
- Target 120–160 mg/day with meals
  - initiate at 40 mg/day
  - lowest effective dose should be used

GEODON is indicated for the treatment of schizophrenia.

Elderly patients with dementia-related psychosis treated with atypical antipsychotic drugs are at an increased risk of death compared to placebo. GEODON is not approved for the treatment of patients with dementia-related psychosis.

GEODON is contraindicated in patients with a known history of QT prolongation, recent acute myocardial infarction, or uncompensated heart failure, and should not be used with other QT-prolonging drugs. GEODON has a greater capacity to prolong the QT<sub>c</sub> interval than several antipsychotics. In some drugs, QT prolongation has been associated with torsade de pointes, a potentially fatal arrhythmia. In many cases this would lead to the conclusion that other drugs should be tried first.

As with all antipsychotic medications, a rare and potentially fatal condition known as neuroleptic malignant syndrome (NMS) has been reported with GEODON. NMS can cause hyperpyrexia, muscle rigidity, diaphoresis, tachycardia, irregular pulse or blood pressure, cardiac dysrhythmia, and altered mental status. If signs and symptoms appear, immediate discontinuation, treatment, and monitoring are recommended.

Individual results may vary.

Please see brief summary of prescribing information on adjacent page.

For more information, please visit [www.pfizerpro.com/GEODON](http://www.pfizerpro.com/GEODON)

Prescribing should be consistent with the need to minimize tardive dyskinesia (TD), a potentially irreversible dose- and duration-dependent syndrome. If signs and symptoms appear, discontinuation should be considered since TD may remit partially or completely.

Hyperglycemia-related adverse events, sometimes serious, have been reported in patients treated with atypical antipsychotics. There have been few reports of hyperglycemia or diabetes in patients treated with GEODON, and it is not known if GEODON is associated with these events. Patients treated with an atypical antipsychotic should be monitored for symptoms of hyperglycemia.

Precautions include the risk of rash, orthostatic hypotension, and seizures.

In short-term schizophrenia trials, the most commonly observed adverse events associated with GEODON at an incidence of ≥5% and at least twice the rate of placebo were somnolence and respiratory tract infection.

In short-term schizophrenia clinical trials, 10% of GEODON-treated patients experienced a weight gain of ≥7% of body weight vs 4% for placebo.

**GEODON**<sup>®</sup>  
(ziprasidone HCl) Capsules



SAVE up to 15%\*

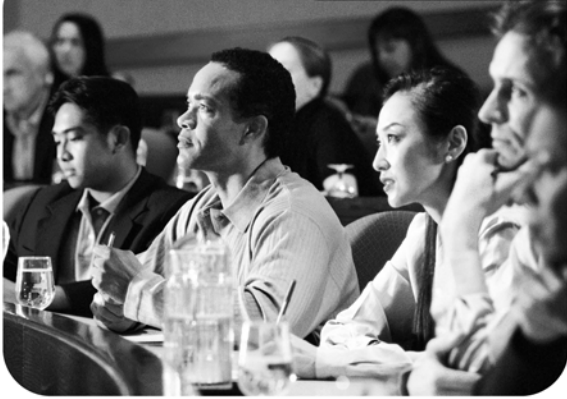

THE OAKSTONE INSTITUTE

## 2009 PSYCHIATRY REVIEW COURSE

April 30-May 03, 2009 Marriott Century Center, Atlanta, GA

An in-depth, case-based review, with current, relevant, and condensed information needed to pass certification (written and oral), recertification, and maintenance of certification exams.

Featuring Expert Faculty from Emory University, The University of Vermont, Harvard Medical School, and Vanderbilt University.

For more information:

[www.cmeonly.com/PS2009](http://www.cmeonly.com/PS2009) • Call 1-800-633-4743

\*10% for two to four attendees, 15% for five or more attendees. Discount is applicable only on tuition fees.

9PSR02

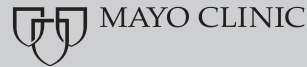

Heal the sick, advance the science, share the knowledge.

## Molecular Imaging in Psychiatry

Mayo Clinic in Rochester, MN, seeks an exceptional mid-career or senior investigator to join psychiatric researchers at Mayo Clinic and the University of Minnesota. The Mayo Clinic and University of Minnesota have created a partnership that has been designed to provide a unique opportunity to establish a clinical neuroscience corridor linking the two institutions. The Mayo Clinic Department of Psychiatry has developed a major program in genomics that is supported by the NIGMS Pharmacogenomics Research network. The University of Minnesota Department of Psychiatry, in partnership with others, has developed a world-class psychiatric brain-imaging program. We are seeking an established investigator who will be able to promote the scientific collaboration between the two programs.

Focusing on understanding the biological basis of psychiatric disease, the incumbent will lead development of ground-breaking molecular techniques that can be evaluated in preclinical and early clinical trials for their potential in diagnosis and treatment. This position has access to cutting-edge molecular technology facilities, plus a clinical patient population primarily being treated for schizophrenia, bipolar disorder and substance abuse. Candidates must have a PhD, MD/PhD or MD degree with national or international recognition, rank of associate professor or full professor, and a track record of NIH or similar grant funding. At Mayo Clinic, you'll enjoy highly competitive pay and benefits, and impressive resources for your research, as well as ample opportunity for multidisciplinary collaboration.

To learn more about Mayo Clinic and Rochester, visit [www.mayoclinic.org/scientist-jobs](http://www.mayoclinic.org/scientist-jobs)

Please direct inquiries and CV with letter of interest to:  
David Mrazek, MD, Chair  
Department of Psychiatry and Psychology  
Mayo Clinic  
200 First Street SW • Rochester, MN 55905

Mayo Foundation is an affirmative action and equal opportunity employer and educator. Post-offer/pre-employment drug screening is required.

## Employers and Candidates Connect through the APA Job Bank

### Employers

- Post your psychiatric position with the APA Job Bank at [psych.org/jobbank](http://psych.org/jobbank) and reach qualified professionals.
- Use the many resources of the APA Job Bank to make a smart recruitment decision.
- Advertise in the *Psychiatric Services* or *Psychiatric News* classifieds and the APA Job Bank and receive a 10% discount on each.
- Post your psychiatric position with the APA Job Bank before the APA Annual Meeting in San Francisco, May 16-21, and use the Conference Connection to set up interviews with candidates at the meeting.

### Candidates

- Search the most comprehensive online listing of psychiatric positions at [psych.org/jobbank](http://psych.org/jobbank).
- Register to post your resume, receive instant job alerts, use the career tools and more.
- Visit the APA Job Bank and find the ideal position.
- Use the APA Job Bank's Conference Connection to contact prospective employers and set up interviews at the APA Annual Meeting in San Francisco, May 16-21.

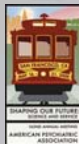

Call 703-907-7330 to post your psychiatric position

## Osler Institute 134<sup>th</sup> to 140<sup>th</sup> Psychiatry Review Courses

approved for AMA/PRA category 1 credit

### for Written Exams

March 30-April 3, 2009 – Boston

### for Oral Boards

Didactic day & 3-day mock orals

March 30 & March 31-April 2 – Boston

June 8 & 9-11 – Denver

September 7 & 8-10, 2009 – Kansas City

### for Recertification Exam

February 14-15 – Tampa

### for Child and Adolescent

April 1-4, 2009 – Boston

*New – Best of Psych Audio*

Call Today: (800) 356-7537

[www.osler.org/y92a](http://www.osler.org/y92a)



# Professor of Psychiatry

## Chairman, Department of Psychiatry

Beth Israel Deaconess Medical Center  
Harvard Medical School

Beth Israel Deaconess Medical Center (BIDMC) and Harvard Medical School (HMS) are seeking nominations for and applications from an established academic leader with demonstrated clinical, research, and teaching excellence, who will be responsible for leading a distinguished academic Department of Psychiatry. The Beth Israel Deaconess Medical Center, a 665-bed tertiary and quaternary care hospital, is a founding member of CareGroupSM, an organized system of quality healthcare serving individuals, families and communities in New England. The incumbent will be the Bullard Professor of Psychiatry at Harvard Medical School, and will sit on the Executive Committee and Board of Directors of Harvard Medical Faculty Physicians at BIDMC, and on the Clinical Operations Executive Committee of BIDMC. The BIDMC Department of Psychiatry is enhanced by the Academic Department of the Massachusetts Mental Health Center (MMHC), the research and academic programs of which have recently been integrated into the BIDMC Department, and which has an unparalleled reputation in American Psychiatry. The Chairman will be expected to strengthen and expand the existing Departmental clinical programs, to lead academic research in Psychiatry, and to support the continuation of a strong residency program in Psychiatry—the Harvard Longwood Psychiatry Residency Training Program—in collaboration with other area Harvard affiliated hospitals. The applicant should have an M.D., or equivalent degree, be Board Certified in Psychiatry in the US, be a leader in a subspecialty of Psychiatry, and should have a well-developed academic background that will merit appointment as Professor at Harvard Medical School.

Letters of nomination or application outlining experience and career goals, Curriculum vitae, and a list of referees who may be contacted should be sent to:

**Albert M. Galaburda, M.D.**  
Chief, Division of Cognitive Neurology  
Chair, Psychiatry Search Committee  
Beth Israel Deaconess Medical Center  
330 Brookline Avenue, KS-274, Boston, MA 02215  
agalabur@bidmc.harvard.edu

*Harvard Medical School and Beth Israel Deaconess Medical Center are Equal Opportunity/Affirmative Action Employers. Women and underrepresented minorities are particularly encouraged to apply.*

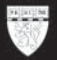

HARVARD MEDICAL SCHOOL

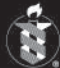

Beth Israel Deaconess  
Medical Center

IOWA HEALTH PHYSICIANS, AN AFFILIATE OF THE IOWA HEALTH SYSTEM, IS SEARCHING FOR **PSYCHIATRISTS** TO JOIN OUR GROWING PRACTICE IN DES MOINES, IOWA.

### Practice Overview

- Clinic is located on the campus of Iowa Lutheran Hospital, the state's largest private hospital-based mental health facility
- Adult inpatient and outpatient responsibilities
- Teaching opportunities available
- Call schedule 1:4
- Excellent compensation/benefit package, including a 2-year salary guarantee, production-based pay, sign-on bonus, and relocation package
- Loan repayment opportunities
- Visa sponsorship available
- First-year compensation potential of \$220,000+

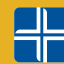

**IOWA HEALTH**  
PHYSICIANS AND CLINICS

For More Information Please Contact Jessica Meisner  
at 888-343-4912 or at [meisnejj@ihs.org](mailto:meisnejj@ihs.org).

## PARTNER WITH A MAGNET HOSPITAL

BC/BE Psychiatrist needed to serve as Medical Director of an 11-bed Inpatient Behavioral Health Services Unit and to add capacity for our Outpatient Program.

Call is shared with 5 local psychiatrists. Practice is located at Aspirus Wausau Hospital, named in the top 100 hospitals in the USA by *US News and World Report*. Work with a great team of young, vibrant psychiatrists. There is great potential for program growth and development with a focus on expanded community action. Excellent compensation and benefit package included.

As you work within the open and inviting architecture of Aspirus, you will be part of our outstanding award-winning facility. We invite you to join a first-rate medical community and a family-friendly quality of life in north central Wisconsin.

Please contact Jamie Sitko today at 800-792-8728 or fax CV to 715-847-2742.

Email: [jamiesi@aspirus.org](mailto:jamiesi@aspirus.org)

[www.aspirus.org](http://www.aspirus.org)

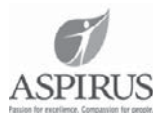

## We are recruiting statewide for Psychiatrists!

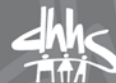

NC DEPARTMENT OF  
HEALTH AND HUMAN SERVICES

[www.ncdhhs.gov](http://www.ncdhhs.gov)

We are striving to enhance quality mental health services for NC citizens and are looking for committed Psychiatrists wanting to make a difference!

As a Psychiatrist at one of our facilities, you will serve as an integral member of an interdisciplinary team, developing comprehensive treatment plans to address the individual, social, medical, and vocational needs of patients.

In addition, you will work in affiliation with prominent residency programs such as the University of North Carolina-Chapel Hill, Duke University, and Wake Forest University. We offer child adolescent, adult admissions, forensic and rehabilitation services at each of our hospitals.

From the mountains to the coast, we employ Psychiatrists at the following Hospitals and Alcohol & Drug Abuse Treatment Centers (ADATC):

- Broughton Hospital • Central Regional Hospital • Cherry Hospital
- Walter B. Jones ADATC • R.J. Blackley ADATC • Julian F. Keith ADATC

As an employee, you will have the security of competitive pay and comprehensive state benefits including the following:

- Loan Repayment Program
- Flexible Scheduling
- Special Pay Incentives
- Medical Malpractice Insurance

For more information visit: [www.ncdhhs.gov](http://www.ncdhhs.gov) or  
contact Michael Taylor at 919.733.2040 or [mtaylor@ncfahp.org](mailto:mtaylor@ncfahp.org)

North Carolina State Government Employer of Choice  
EO/AA Employer

## BOARD-CERTIFIED / BOARD-ELIGIBLE PSYCHIATRIST

The **VA Medical Center** is looking for a Board Certified Board Eligible Psychiatrist. This person will serve as a member of a multidisciplinary team. He/she will focus on the assessment/evaluation and medication management of veterans who suffer from mental health conditions, i.e., post traumatic stress disorder (PTSD), substance abuse, depression, anxiety and other related conditions.

Candidate will provide clinical assessment/evaluation of veterans with difficult and complex mental health issues and then selecting from a variety of resources and clinical approaches including non-direct and cognitive behavior therapy, behavioral modification, insight oriented methods, family therapy, medication management, etc.

The applicant selected for this position may be eligible for education debt reduction program; approval is subject to availability of funds. Recruitment/relocation bonus is authorized for a highly qualified candidate. If interested please contact:

**VA Medical Center  
2121 North Avenue  
Grand Junction CO 81501  
Phone: (970) 263-5068 or  
Phone: (970) 263-5062**

## DIRECTOR OF PSYCHIATRY

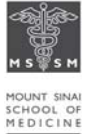

Mount Sinai School of Medicine's affiliation with **Queens Hospital Center** is seeking a Director of Psychiatry to oversee the full range of clinical and administrative functions in the Department of Psychiatry at **Queens Hospital Center**.

The Department of Psychiatry provides a comprehensive array of clinical services to a vibrant, multicultural community, including a Comprehensive Psychiatric Emergency Program, Inpatient and Outpatient Mental Health Services and Chemical Dependency Services.

Ideal candidate is Board Certified, with extensive experience in a leadership role. Faculty appointment at **Mount Sinai School of Medicine** will be commensurate with credentials, experience and qualifications. Opportunity for teaching and research activities.

We offer a competitive salary and comprehensive benefits. For consideration, please send your CV to:

**Jasmin Moshirpur, MD  
Medical Director  
Queens Hospital Center  
82-68 164th Street  
Jamaica, NY 11432  
E-mail: Moshirpj@nychhc.org  
Fax: (718) 334-2392**

WE ARE AN EEO EMPLOYER FOSTERING DIVERSITY IN THE WORKPLACE W/M/D/V

## Chairman Department of Psychiatry

**MetroWest Medical Center** is seeking a dynamic, creative psychiatrist to lead the Department of Psychiatry. The Chairman will be responsible for providing clinical and administrative leadership to an active department that includes 28 psychiatrists practicing in a 469-bed, two-hospital system, located in the Western suburbs of Boston.

The ideal candidate will possess:

- A strong, demonstrated track record in Physician leadership
- Board certification in psychiatry
- Current experience in clinical practice with exceptional clinical skills and commitment to quality
- Administrative experience in a hospital setting
- Ability to foster collaborative relationships with local physicians
- Vision to develop outstanding inpatient and outpatient psychiatric services

The Department of Psychiatry provides a broad range of psychiatric services in a community setting. The hospital has 48 beds devoted to Child, Adult, and Geriatric inpatient care; Evaluation and Referral Services; ECT Services; and a Partial Hospital Program.

**MetroWest Medical Center** is a fiscally strong medical system that is highly regarded for its commitment to psychiatric care. The MetroWest region of Massachusetts is an attractive and growing area with excellent school systems and convenient access to Boston.

Interested Candidates should send their curriculum vitae in confidence to:

Rebecca Woods, Market VP · Physician Recruitment and Retention  
Vanguard Health Systems/MetroWest Medical Center  
132 Turnpike Road, Suite 200 · Southborough, MA 01772  
Inquiries: 508-363-9921 · E-mail: [tmcadams@vhsnewengland.com](mailto:tmcadams@vhsnewengland.com)

# Psychiatrists - Wisconsin

Marshfield Clinic is nationally recognized for providing physicians with the most advanced medical equipment and health information technology today.

**We have openings for BE/BC Adult Psychiatrists** to join our expanding services. At our Marshfield campus, candidates with fellowship training in neuropsychiatry, geriatric psychiatry or consultative psychiatry are preferred. **Additional practice opportunities are also available at our various clinics throughout Wisconsin.** These primarily outpatient practices can be a mix of C/A and adult patients and employ a multidisciplinary team approach.

With over 770 physicians practicing at 43 locations throughout Wisconsin, Marshfield Clinic is the leader in providing high quality health care to the region. We have created an atmosphere for a clinical practice that exceeds most others. We offer physicians an excellent practice in an academic setting with opportunities for research and teaching. In addition, you will be in the midst of excellent school systems, and safe, friendly communities with easy access/proximity to major metropolitan areas including Chicago and Minneapolis.

To learn more about these opportunities and the very competitive compensation package, please contact: Beth Albee, Physician Recruitment, Marshfield Clinic, 1000 N. Oak Ave., Marshfield, WI 54449. **Phone:** 800-782-8581, extension 19775; **Fax #:** 715-221-9779. **E-mail:** [albee.beth@marshfieldclinic.org](mailto:albee.beth@marshfieldclinic.org)  
**Website:** [www.marshfieldclinic.org/recruit](http://www.marshfieldclinic.org/recruit)

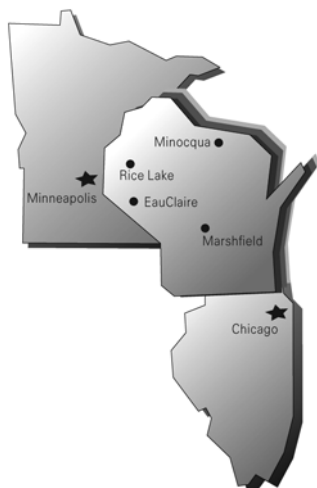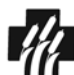

MARSHFIELD CLINIC

*Where the future of medicine lives*

Marshfield Clinic is an Affirmative Action/Equal Opportunity employer that values diversity. Minorities, females, individuals with disabilities and veterans are encouraged to apply. Sorry, not a health professional shortage area.

## #1 Integrated Health System

- ✓ Top 10 Clinic!
- ✓ Top 10 Hospital
- ✓ Low Cost Living

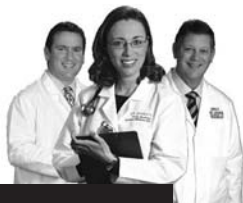

- Flexible Scheduling
- Family Friendly practice and community of 200k
- 30 Bed Inpatient Unit

A Psychiatrist, BC / BE, is being sought to join a three-physician Adult practice. Enjoy your life and practice with long-term physicians and staff. St. John's Clinic is a 480 physician multi-specialty clinic offering a very large referral base!

St. John's Regional Health Center, Springfield, Missouri is an 886-bed, level-one trauma center. St. John's Hospital serves as a referral hospital for 6+ regional hospitals serving 40 communities and covering 25,000 square miles.

SPRINGFIELD, MISSOURI, is located three hours south and southwest of Kansas City and St. Louis, respectively. A growing mid-sized city in the foothills of the Ozark Mountains, Springfield offers everything from Broadway performances and minor league and Division I athletics to outstanding schools and some of the best outdoor sporting opportunities available. Employment Review named Springfield one of the 20 "Best Places to Live and Work" in the U.S. Housing costs, projected job growth, education, healthcare, taxes, recreation, the arts, and general cost of living rates, make living and working here a pleasure. For more information about Springfield, go to [www.springfieldmo.org](http://www.springfieldmo.org).

For more information, please contact:

Julie A. Oliver,  
Physician Recruiter  
St. John's Clinic  
Phone: 800-218-5079  
Fax: 888-290-8300  
E-mail: [JAOLiver@mercy.net](mailto:JAOLiver@mercy.net)  
EOE/AA Employer

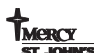

ST. JOHN'S  
Clinic

# Chair of the Department of Psychiatry and Behavioral Sciences Duke University School of Medicine

**Duke University School of Medicine** invites applications and nominations for the Chair of Psychiatry and Behavioral Sciences. Candidates should have a strong background in academic medicine, including a track record of excellence in patient care, medical education, research and significant leadership experience with peers, trainees and students.

The Department consists of over 400 clinical and research faculty, including psychiatrists, psychologists, medical sociologists, social workers and substance abuse counselors. Clinical services are provided across the entire spectrum of mental illness. Training programs educate medical students, residents, fellows and psychology interns. The Department has over 120 million dollars per year in research support and ranks 4th in funding from the National Institute of Health. Research spans broad areas of social, psychological and biological disciplines focused in behavioral medicine, neurobiology, nicotine and toxicity, epidemiology and intervention trials.

Duke University School of Medicine is among the top research medical schools in the country, annually ranked among the top five schools in NIH funding and among the top 10 by *U.S. News and World Report*. The Duke University Health System's signature clinical facility, Duke University Hospital, is a Magnet hospital located on the Duke Campus and is currently ranked 7th by *U.S. News and World Report*.

The successful candidate should have an M.D. or M.D., Ph.D., academic credentials that qualify for appointment at the rank of Professor with tenure, board certification in psychiatry and eligibility for a license to practice medicine in North Carolina.

Interested individuals should submit a statement of interest and curriculum vitae to: **Christopher O'Connor, M.D., Professor of Medicine, Box 3356, Duke University Medical Center, Durham, NC 27710 or via email to: [occonn002@mc.duke.edu](mailto:occonn002@mc.duke.edu).**

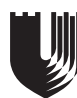

**Duke University**  
School of Medicine

*Duke University & Health System is an Equal Opportunity/  
Affirmative Action Employer.*

**WANTED: HIGH QUALITY PSYCHIATRISTS**

UTMB-CMC employs Psychiatrists at multiple adult and juvenile facilities all over Texas. We currently have multiple locations for child/adolescent experienced psychiatrists. We are heavy utilizers of telepsychiatry using state of the art technology and an electronic medical records.

We are a correctional healthcare system that is setting the standard for others. Correctional Managed Care is among the world's leaders in telemedicine and electronic medical record applications. Innovative programs, creative solutions and participation in the Baldrige National Quality Program further define our organization and help lead us toward performance excellence.

**Current Opportunities Available**

- ✓ BROWNWOOD: Staff Psychiatrist – Youth Services
- ✓ MART: Staff Psychiatrist – Youth Services
- ✓ AUSTIN: Staff Psychiatrist – Telemedicine Center
- ✓ CORSICANA: Staff Psychiatrist – Youth Services
- ✓ Positions also available for Psychiatric Physician Assistants and Nurse Practitioners

**Compare our benefits with other organizations:**

- ✓ Relocation allowance
- ✓ \$2000 CME stipend per fiscal year
- ✓ 5 days paid CME leave
- ✓ Competitive salaries
- ✓ Biannual CMC conferences
- ✓ M-F work schedule-day shift
- ✓ Flexible schedules
- ✓ Limited on-call rotation
- ✓ Professional liability coverage
- ✓ Comprehensive medical coverage
- ✓ Paid vacation, holidays and sick leave
- ✓ State retirement plan in ORP or TRS with State contributions.

*Correctional practice eliminates many of the "headaches" of community practice such as dealing with insurance companies including Medicare and Medicaid and malpractice insurance problems.*

To learn more about our programs go to:  
[www.utmb.edu/cmc](http://www.utmb.edu/cmc)

To Apply contact Debbe Dansbe 409-747-2619 or 866-900-2622  
or email resume: [dstdansbe@utmb.edu](mailto:dstdansbe@utmb.edu)

UTMB is an EO/AA Employer M/F/D/V

**PSYCHIATRISTS**

*The VA Needs You*

Shreveport, LA  
Alexandria, LA  
Biloxi, MS

Pensacola, FL  
Mt. Vernon, MO  
Muskogee, OK

Fayetteville, AR  
Fort Smith, AR  
Mobile, AL

Psychiatrist positions require: BE/BC Psychiatrists, current, full, unrestricted licensure (any state), U.S. citizen Great Benefits, Excellent Pay, Rewarding Work. See announcements on [www.vacareers.va.gov](http://www.vacareers.va.gov). Recruitment/Relocation incentives may be authorized, ask contact individual for details.

**BILOXI/PENSACOLA** Outpatient and Inpatient Psychiatry positions. Expertise in substance abuse, geropsychiatry and PTSD preferred. BE/BC psychiatrist, state license (any state), U.S. citizen or permanent resident. Send applications to Jean Williams, HRMS (05A), 400 Veterans Avenue, Biloxi, MS or contact at [jean.williams@med.va.gov](mailto:jean.williams@med.va.gov) or (228) 523-5633.

**ALEXANDRIA** Strong Clinical Skills. Prefer experience in General Outpatient, Inpatient Psychiatry, and Substance Abuse. CV/Application to [heather.ball@va.gov](mailto:heather.ball@va.gov) or mail to Heather Ball/Psychiatry Service (116), P.O. Box 69004, Alexandria, LA 71306-9004. For additional questions, please call (318) 466-2958.

**SHREVEPORT** Prefer experience in Substance Abuse, PTSD. Contact Kathy Arroyo at (318)990-5154 or email at [Kathy.arroyo@va.gov](mailto:Kathy.arroyo@va.gov). Email or mail your CV to VAMC, HRMS (05) KA, 510 E. Stoner Ae, Shreveport, LA 71101.

**FAYETTEVILLE, FORT SMITH, ARKANSAS; BRANSON, MISSOURI** Contact Betty Gray (479)443-4301 ext 5188 or email: [betty.gray@va.gov](mailto:betty.gray@va.gov).

**MUSKOGEE, OK** Contact Jason Cleveland, HRMS at 918-577-3800.

**JACKSON, MISSISSIPPI** Prefer experience in general psychiatry, including inpatient, outpatient, consultative, or telemedicine psychiatry. Interested candidates should submit a CV to Felicia Owens, Human Resources (05P), VA Medical Center, 1500 E. Woodrow Wilson Dr., Jackson, MS 39216 or [Felicia.owens@va.gov](mailto:Felicia.owens@va.gov) phone: 601-364-1575.

**Rush Medical College/Rush University Medical Center**

CHAIR, DEPARTMENT OF PSYCHIATRY

**Rush Medical College at Rush University Medical Center** is seeking outstanding candidates for the position of Endowed Professor and Chair of the Department of Psychiatry. The Department is founded on a long tradition of excellence in clinical care, research and teaching. Currently, there are five endowed chairs in the department. The Department Chair has oversight over the Sections of Adult and Child Psychiatry. **Rush** is committed to providing outpatient and inpatient psychiatry services, with separate inpatient units for geriatric psychiatry; adult affective disorders, general psychiatry, and child psychiatry. The Chair also has responsibility for fully accredited training programs in Adult Psychiatry and Child Psychiatry.

Candidates must have an outstanding record of commitment to clinical service and research, and substantial administrative experience with an established national reputation as an academic leader. A commitment to advancement of the Department's research mission is also important. In addition, candidates must possess a commitment to innovation in the field and the leadership skills necessary for faculty development and advancement of clinical and academic missions.

**Rush Medical College** is one of the oldest medical colleges, established in 1837, and one of the largest private academic medical centers in Illinois. The Rush System for Health encompasses an 824 bed hospital serving adults and children, the 110 bed Johnston R. Bowman Center, Rush University, and four affiliate hospitals. **Rush** is a thriving center for basic and clinical research, with a newly built state-of-the-art research facility and over 1,600 active investigations.

In 2004, **Rush University Medical Center** in Chicago initiated its plan for the most comprehensive construction and facilities renovation program in its history. The "Rush Transformation" refers to Rush's plans to invest in new technology and build new facilities. This nine-year project will thoroughly redefine our physical plant and technology, as well as many of the processes we use to deliver patient care safely and efficiently.

We encourage women and minorities to apply. Nominations or letters of interest that include curriculum vitae should be sent to:

Julie Karstrand  
Staff Support for Search/Office of the Dean  
Rush University Medical Center  
600 South Paulina · Chicago, Illinois 60612

Or preferably electronically to: [Julie\\_Karstrand@rush.edu](mailto:Julie_Karstrand@rush.edu)

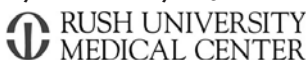

CVs should be submitted no later than **April 30, 2009**

**Rush is an equal opportunity/Affirmative Action employer**

# Index to Advertisers

## February 2009

The publication of an advertisement in this journal does not imply endorsement of the product or service by the American Psychiatric Association.

Employment Opportunities ..... A17; A19-A22

The Oakstone Institute ..... A17

Osler Institute ..... A17

UCB Pharma Inc.

Venlafaxine ..... A7-A9

### Subscription and Business Information

The American Journal of Psychiatry, ISSN 0002-953X, is published monthly by the American Psychiatric Association, 1000 Wilson Blvd., Suite 1825, Arlington, VA 22209-3901. Subscriptions (per year): individual \$205.00, international \$308.00. For additional subscription options, including single issues and student rates, please contact Customer Service at 1-800-368-5777 or email [appi@psych.org](mailto:appi@psych.org). Institutional subscriptions are tier priced. For institutional site license or pricing information, contact Customer Service or visit <http://highwire.stanford.edu/tfocis/>.

Business communications, address changes, and subscription questions from APA members should be directed to the Division of Member Services: (888) 35-PSYCH (toll-free). Nonmember subscribers should call the Circulation Department (800) 368-5777. Author inquiries should be directed to the Journal editorial office: (703) 907-7885 or (703) 907-7884; fax (703) 907-1096; e-mail [ajp@psych.org](mailto:ajp@psych.org).

Business Management: Nancy Frey, Director, Publishing Services; Laura G. Abedi, Associate Director, Production; Brian Skepton, Advertising Sales and Marketing Manager, Nonpharmaceutical and Online Sales; Alison Jones, Advertising Prepress Manager; Robert Pursell, Director, Sales and Marketing.

Advertising Information: (703) 907-8553; American Psychiatric Publishing, Inc., 1000 Wilson Blvd., Suite 1825, Arlington, VA 22209-3901

Pages are produced using Adobe FrameMaker+ SGML 6.0. Printed by RR Donnelley, Mendota, IL., on acid-free paper effective with Volume 164, Number 11, November 2007.

Periodicals postage paid at Arlington, VA, and additional mailing offices. POSTMASTER: Send address changes to The American Journal of Psychiatry, Circulation Department, American Psychiatric Association, 1000 Wilson Blvd., Suite 1825, Arlington, VA 22209-3901.

Indexed in Abstracts for Social Workers, Academic Abstracts, Biological Abstracts, Chemical Abstracts, Chicago Psychoanalytic Literature Index, Cumulative Index to Nursing Literature, Excerpta Medica, Hospital Literature Index, Index Medicus, International Nursing Index, Nutrition Abstracts, Psychological Abstracts, Science Citation Index, Social Science Source, and Social Sciences Index.

The American Psychiatric Association does not hold itself responsible for statements made in its publications by contributors or advertisers. Unless so stated, material in The American Journal of Psychiatry does not reflect the endorsement, official attitude, or position of the American Psychiatric Association or of the Journal's Editorial Board.

Authorization to photocopy items for internal or personal use, or the internal or personal use of specific clients, is granted by the American Psychiatric Association for libraries and other users registered with the Copyright Clearance Center (CCC) Transactional Reporting Service, provided that the base fee of \$15.00 per copy is paid directly to CCC, 222 Rosewood Drive, Danvers, MA 01923; (978) 750-8400 (tel), (978) 646-8600 (fax), [www.copyright.com](http://www.copyright.com) (web site). 0002-953X/05/\$15.00.

This consent does not extend to other kinds of copying, such as copying for general distribution, for advertising or promotional purposes, for creating new collective works, or for resale. Requests for commercial distribution should be directed to (703) 907-7894. APA does not require that permission be obtained for the photocopying of isolated articles for nonprofit classroom or library reserve use; all fees associated with such permission are waived.

Copyright © 2009 American Psychiatric Association.

# Essential New TEXTBOOKS in PSYCHIATRY

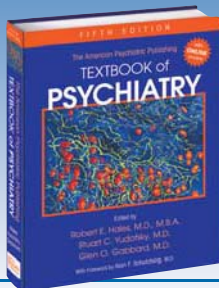

## The American Psychiatric Publishing Textbook of Psychiatry

Edited by  
Robert E. Hales, M.D., M.B.A.,  
Stuart C. Yudofsky, M.D.,  
and Glen O. Gabbard, M.D.

With Foreword by  
Alan F. Schatzberg, M.D.

This book has been meticulously revised by more than 100 contributors—65 new to this edition—summarize the latest developments in psychiatry, with new chapters on cellular and molecular biology; neuroanatomy; human sexuality and sexual dysfunctions; nonpharmacological somatic treatments; supportive psychotherapy; combined psychotherapy and pharmacotherapy; treatment of gay, lesbian, bisexual, and transgender patients; and assessment of dangerousness.

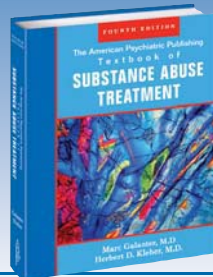

## The American Psychiatric Publishing Textbook of Substance Abuse Treatment, Fourth Edition

Edited by Marc Galanter, M.D.,  
and Herbert D. Kleber, M.D.

This book has been fully updated to present the most current scientific and clinical information on a wide range of substance use disorders. It is a comprehensive guide to treatment written at a level appropriate to both experienced and new clinicians, reflecting the expertise of leading addiction specialists in psychiatry and allied fields. With most chapters extensively revised by new authors, it incorporates the latest biomedical research findings as well as recent advances in treatment modalities and the growth of pharmacotherapies.

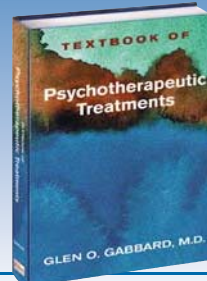

## Textbook of Psychotherapeutic Treatments

Edited by Glen O. Gabbard, M.D.

Glen O. Gabbard, author or editor of more than 22 books and over 280 scientific papers and book chapters, is a leader in the fields of psychiatry and psychoanalysis. He has assembled 50 of the world's most renowned experts in every psychotherapeutic school of thought to create this definitive volume, sure to become the standard text for all student and practicing psychotherapists.

Treatment outcome depends on carefully matching the therapeutic modality to the patient or client, and this book will both facilitate and enhance that meticulous process. Up-to-date and scientifically rigorous, this book is the "go-to" reference for the conscientious psychotherapist.

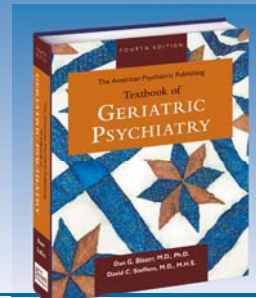

## The American Psychiatric Publishing Textbook of Geriatric Psychiatry, Fourth Edition

Dan G. Blazer, M.D., Ph.D.,  
David C. Steffens, M.D., M.H.S.

Widely recognized as the standard in its field, *The American Psychiatric Textbook of Geriatric Psychiatry* has been revised and updated while continuing the tradition of providing both scholar and clinician with the practical skills and knowledge required for understanding mental disorders in later life. It offers an authoritative review of a wide range of topics written by leaders in geriatric psychiatry, gerontology, geriatric medicine, and geriatric nursing, offering a solid grounding in both basic science and clinical applications.

2008 • 1,818 pages  
ISBN 978-1-58562-257-3  
Hardcover • \$285.00  
Item #62257

2008 • 768 pages  
ISBN 978-1-58562-276-4  
Hardcover • \$165.00  
Item #62276

2009 • 944 pages  
ISBN 978-1-58562-304-4  
Hardcover • \$95.00  
Item #62304

2009 • 720 pages  
ISBN 978-1-58562-277-1  
Hardcover • Item #62277

Special prepublication price  
of \$134.00 until February 28,  
2009 (thereafter \$149.00)

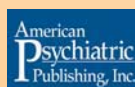

The First and Last Word in Psychiatry

Order Online: [www.appi.org](http://www.appi.org) • Phone: 1-800-368-5777 • Fax: 703-907-1091 • Email: [appi@psych.org](mailto:appi@psych.org)

Priority Code AH903
