# THE AMERICAN JOURNAL OF PSYCHIATRY

---

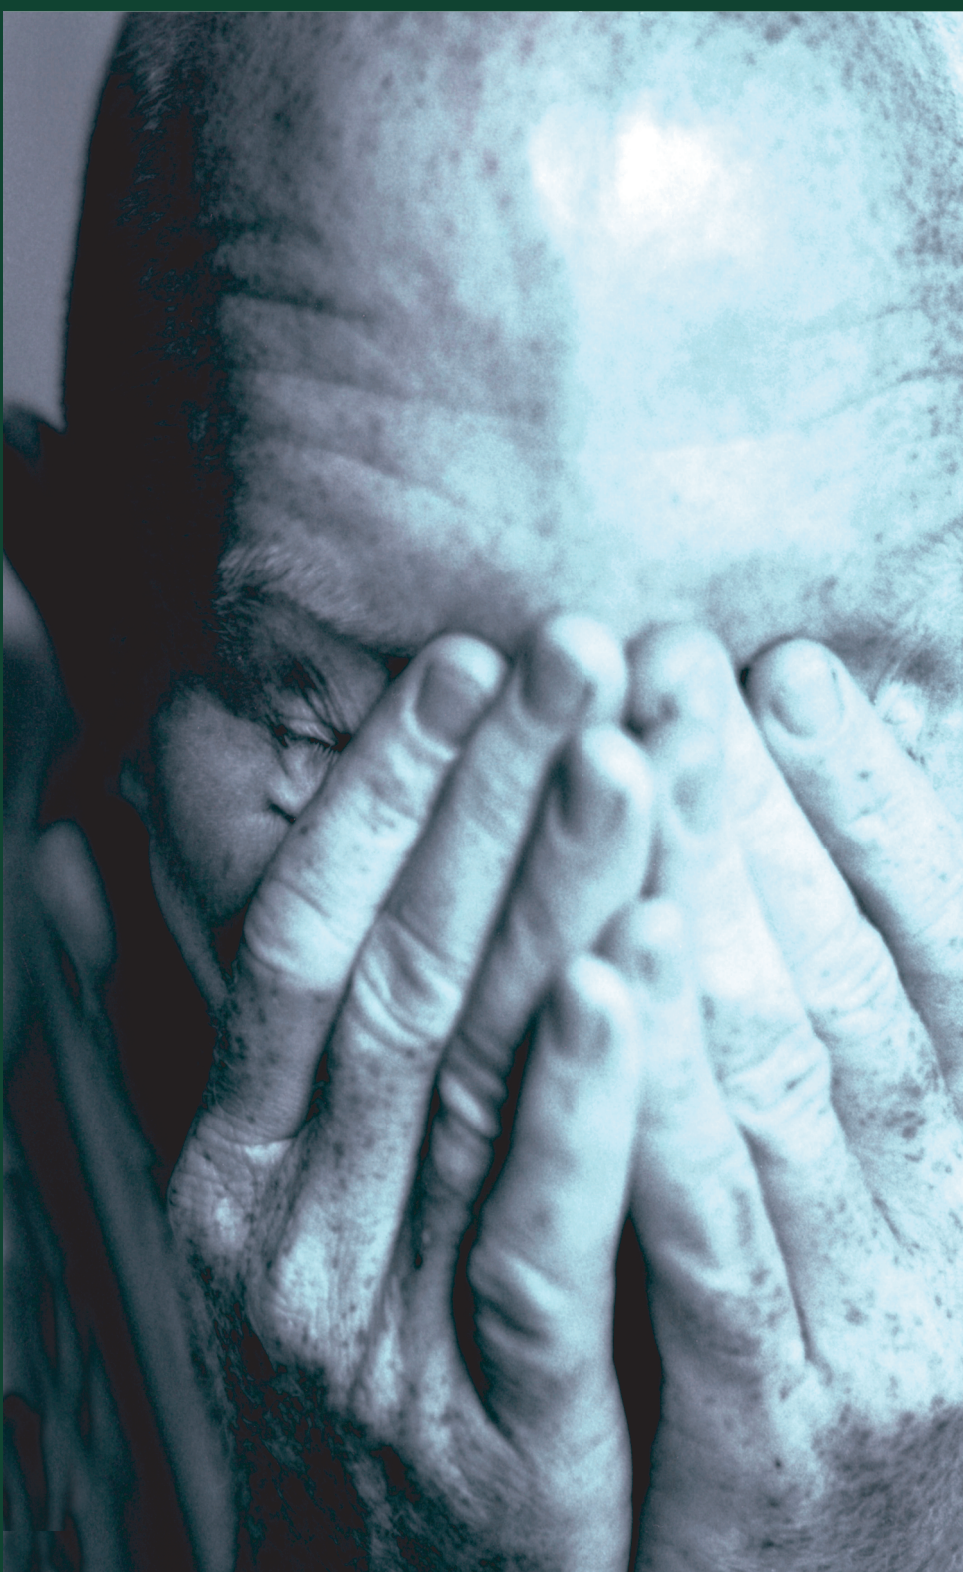

## **Psychosis in the Elderly**

Helen H. Kyomen, M.D., M.S. and  
Theodore H. Whitfield, Sc.D., M.S. 146

## **Correlates of Treatment-Emergent Mania Associated With Antidepressant Treatment in Bipolar Depression**

Mark A. Frye, M.D., et al. 164

## **Manic Symptoms During Depressive Episodes in 1,380 Patients With Bipolar Disorder: Findings From the STEP-BD**

Joseph F. Goldberg, M.D., et al. 173

## **◀ Older Adults' Attitudes Toward Enrollment of Non-competent Subjects Participating in Alzheimer's Research**

Jason Karlawish, M.D., et al. 182

**Continuing Medical Education 259**

**February 2009**

**Volume 166 • Number 2**

---

Official Journal of the  
AMERICAN PSYCHIATRIC ASSOCIATION

---

[ajp.psychiatryonline.org](http://ajp.psychiatryonline.org)
