# THE AMERICAN JOURNAL OF PSYCHIATRY

## EDITOR-IN-CHIEF

Robert Freedman, M.D.

## DEPUTY EDITORS

David A. Lewis, M.D.

Robert Michels, M.D.

Daniel S. Pine, M.D.

Susan K. Schultz, M.D.

Carol A. Tamminga, M.D.

## EDITORIAL STAFF

### Editorial Director

Michael D. Roy

### Senior Editor/Features Writer

Jane Weaver, E.L.S.

### Senior Editors

John J. Guardiano, Ph.D.  
Leannah M. Harding, M.S., E.L.S.

### Production Manager

Julie C. Blair

### Graphic Designer

Steve Hennessey

### Assistant Editor

Angela Moore

### Editorial Support

Services Manager  
Kourtney Skinner

### Editorial Assistant

Samantha Luck

### Administrative Assistant

Victoria Chihos

### Assistants to the Editors

Lois Lilienthal  
Lindsay Karr  
Rachel Hogg  
Russell A. Scholl

## ASSOCIATE EDITORS

Kathleen T. Brady, M.D., Ph.D.

David A. Brent, M.D.

Linda Brzustowicz, M.D.

Cameron S. Carter, M.D.

Howard H. Goldman,  
M.D., Ph.D.

Daniel C. Javitt, M.D.

Bankole Johnson, M.D.

Ellen Leibenluft, M.D.

Jeffrey A. Lieberman, M.D.

Barbara Milrod, M.D.

Maria A. Oquendo, M.D.

Jerrold F. Rosenbaum, M.D.

A. John Rush, M.D.

Larry J. Siever, M.D.

Patricia Suppes, M.D., Ph.D.

Myrna M. Weissman, Ph.D.

## EDITORS EMERITI

Nancy C. Andreasen,  
M.D., Ph.D.

John C. Nemiah, M.D.

## FORMER EDITORS

Amariah Brigham, M.D.  
1844-1849

T. Romeyn Beck, M.D.  
1849-1854

John P. Gray, M.D.  
1854-1886

G. Alder Blumer, M.D.  
1886-1894

Richard Dewey, M.D.  
1894-1897

Henry M. Hurd, M.D.  
1897-1904

Edward N. Brush, M.D.  
1904-1931

Clarence B. Farrar, M.D.  
1931-1965

Francis J. Braceland, M.D.  
1965-1978

The American Journal of Psychiatry is online at [ajp.psychiatryonline.org](http://ajp.psychiatryonline.org)

# THE AMERICAN PSYCHIATRIC ASSOCIATION

1000 Wilson Blvd., Suite 1825, Arlington, VA 22209-3901  
(888) 357-7924 (toll-free inside the U.S. and Canada) / (703) 907-7300  
web site: [www.psych.org](http://www.psych.org) / e-mail: [apa@psych.org](mailto:apa@psych.org)

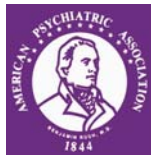

## OFFICERS 2008–2009

|                            |                                |
|----------------------------|--------------------------------|
| <b>President</b>           | Nada L. Stotland, M.D., M.P.H. |
| <b>President-Elect</b>     | Alan F. Schatzberg, M.D.       |
| <b>Vice-President</b>      | Carol A. Bernstein, M.D.       |
| <b>Secretary-Treasurer</b> | David Fassler, M.D.            |

## ASSEMBLY

|                      |                           |
|----------------------|---------------------------|
| <b>Speaker</b>       | Ronald M. Burd, M.D.      |
| <b>Speaker-Elect</b> | Gary S. Weinstein, M.D.   |
| <b>Recorder</b>      | Bruce A. Hershfield, M.D. |

## MEDICAL DIRECTOR'S OFFICE

|                                                                       |                                |
|-----------------------------------------------------------------------|--------------------------------|
| <b>Medical Director and CEO</b>                                       | James H. Scully, Jr., M.D.     |
| <b>Chief Executive Officer, American Psychiatric Publishing, Inc.</b> | Ronald E. McMillen             |
| <b>Executive Director, APIRE Division of Research</b>                 | Darrel A. Regier, M.D., M.P.H. |
| <b>Executive Director, American Psychiatric Foundation</b>            | Paul T. Burke                  |

## BOARD OF TRUSTEES

|                                 |                             |
|---------------------------------|-----------------------------|
| Thomas K. Ciesla, M.D.          | Pedro Ruiz, M.D.            |
| Mary Helen Davis, M.D.          | Steven S. Sharfstein, M.D.  |
| Melinda G. Fierros, M.D.        | Lauren M. Sitzer, M.D.      |
| Jeffrey L. Geller, M.D., M.P.H. | John Chapman Urbaitis, M.D. |
| Dilip V. Jeste, M.D.            | Amy M. Ursano, M.D.         |
| James E. Ninger, M.D.           | Sidney H. Weissman, M.D.    |
| Roger Peele, M.D.               | William M. Womack, M.D.     |
| Carolyn B. Robinowitz, M.D.     |                             |

## AMERICAN PSYCHIATRIC PUBLISHING, INC.

### BOARD OF DIRECTORS 2006–2009

|                            |                                      |
|----------------------------|--------------------------------------|
| <b>President and Chair</b> | Katharine Phillips, M.D.             |
| <b>Secretary</b>           | Donna M. Norris, M.D.                |
| <b>Treasurer</b>           | Joan A. Lang, M.D.                   |
| Dwight L. Evans, M.D.      | Pedro Ruiz, M.D.                     |
| John M. Oldham, M.D.       | Donna E. Stewart, M.D., F.R.C.P.(C.) |
| Laura W. Roberts, M.D.     |                                      |

### EX-OFFICIO MEMBERS

|                                              |                                |
|----------------------------------------------|--------------------------------|
| <b>APA President</b>                         | Nada L. Stotland, M.D., M.P.H. |
| <b>APA President-Elect</b>                   | Alan F. Schatzberg, M.D.       |
| <b>APA Secretary-Treasurer</b>               | David Fassler, M.D.            |
| <b>APA Medical Director and CEO</b>          | James H. Scully, Jr., M.D.     |
| <b>Editor-in-Chief, Psychiatric Services</b> | Howard Goldman, M.D.           |
| <b>Editor-in-Chief, Books</b>                | Robert E. Hales, M.D., M.B.A.  |

The American Journal of Psychiatry is online at [ajp.psychiatryonline.org](http://ajp.psychiatryonline.org)

**THE AMERICAN PSYCHIATRIC ASSOCIATION**  
**Chairpersons of Councils, Commissions, Committees, and Task Forces**

**Standing Committees**

**Bylaws**  
John O. Gaston, M.D.

**Elections**  
Kathleen M. Mogul, M.D.

**Ethics**  
Wade C. Myers, M.D.

**Finance and Budget**  
Jack W. Bonner III, M.D.

**Audit**  
David Fassler, M.D.

**Financial Oversight**  
Jack W. Bonner III, M.D.

**Investment Oversight**  
Larry R. Faulkner, M.D.

**Long-Term Financial Planning**  
Richard K. Harding, M.D.

**Joint Reference**  
Alan F. Schatzberg, M.D.

**Information Technology**  
John Luo, M.D.

**Membership**  
Joseph Ezra V. Rubin, M.D.

**Nominating**  
Carolyn B. Robinowitz, M.D.

**Tellers**  
Michael Houston, M.D.

---

**Council on  
Addiction Psychiatry**

Eric C. Strain, M.D.

**Training and Education  
in Addiction Psychiatry**  
Syed P. Sattar, M.D.

**Treatment Services for Patients  
With Addictive Disorders**  
Petros Levounis, M.D.

---

**Council on Advocacy  
and Public Policy**

Robert Paul Cabaj, M.D.

**Advocacy and Litigation Funding**  
Jeffrey L. Metzner, M.D.

**Government Relations**  
Barry Bruce Perlman, M.D.

**Public Affairs**  
William E. Callahan, M.D.

---

**Council on Aging**

Robert Paul Roca, M.D.

**Access and Effectiveness of  
Psychiatric Services for the Elderly**  
David Allen Casey, M.D.

**Ethnic Minority Elderly**  
Maria D. Llorente, M.D.

**Long-Term Care and  
Treatment for the Elderly**  
Laurence B. Luné, M.D.

---

**Council on Children,  
Adolescents, and Their  
Families**

Michael Houston, M.D.

**Developmental Disabilities**  
Joel D. Bregman, M.D.

**Family Violence and Abuse**  
Gail E. Robinson, M.D.

**Blanche F. Ittleson Research Award**  
Elizabeth B. Weller, M.D.

**Juvenile Justice Issues**  
Louis J. Kraus, M.D.

**Agnes Purcell McGavin Award**  
John E. Schowalter, M.D.

**Infancy and Early Childhood**  
Jean M. Thomas, M.D.

**Mental Health and Schools**  
Marcia J. Slattery, M.D.

**Mental Health on College and  
University Campuses**  
Jerald Kay, M.D.

**Violence Against Children**  
Sandra J. Kaplan, M.D.

---

**Council on  
Global Psychiatry**

Lawrence Hartmann,  
M.D.

**Misuse and Abuse of Psychiatry**  
Alan A. Stone, M.D.

**Psychiatric Dimensions of Disasters**  
S. Arshad Husain, M.D.

---

**Council on Healthcare  
Systems and Financing**

Anita Smith Everett, M.D.

**APA/Business Relations**  
Stephen H. Heidel, M.D.

**Managed Care**  
Paul Henry Wick, M.D.

**Medicare Advisory**  
Edward Gordon, M.D.

**Private Practice**  
Appointment pending

**Psychiatry in the Workplace**  
Andrea G. Stolar, M.D.

**Public Funding for Psychiatric  
Services**  
Laurence H. Miller, M.D.

**Reimbursement for Psychiatric Care**  
Joseph T. English, M.D.

**RBRVS, Codes and Reimbursement**  
Ronald M. Burd, M.D.

---

**Council on  
Medical Education  
and Lifelong Learning**

Sandra Sexson, M.D.

**APA/Bristol-Myers Squibb  
Fellowship Selection**  
David W. Preven, M.D.

**APA/SAMHSA Minority Fellowship  
Selection and Advisory**  
Maria A. Oquendo, M.D.

**APA/GlaxoSmithKline  
Fellowship Selection and Program**  
Leah Joan Dickstein, M.D.

**APA/Lilly Products  
Resident Research Award**  
Charles L. Bowden, M.D.

**CME/Lifelong Learning**  
Mark Hyman Rapaport,  
M.D.

**Commercial Support**  
Michael D. Jibson, M.D.

**Graduate Education**  
Sidney Herman Weissman,  
M.D.

**History and Library**  
Laura D. Hirshbein, M.D.

**Medical Student Education**  
Linda Faith Pessar, M.D.

**Psychiatric Administration  
and Management**  
L. Mark Russakoff, M.D.

**Residents and Fellows**  
Molly K. McVoy, M.D.

**Scientific Program**  
Joseph A. Cheong, M.D.

**Scientific Program Committee of the  
Institute on Psychiatric Services**  
Jacqueline M. Feldman, M.D.

**Vestermark Award**  
Frederick G. Guggenheim,  
M.D.

---

**Council on Member and  
District Branch Relations**

Jeffrey S. Akman, M.D.

**Distinguished Service Award**  
Nada L. Stotland, M.D.,  
M.P.H.

**Newsletter of the Year**  
Denis J. Milke, M.D.

**Physician Health, Illness  
and Impairment**  
Joel J. Silverman, M.D.

---

**Council on Minority Health  
and Health Disparities**

Sandra C. Walker, M.D.

**American Indian, Alaska Native and  
Native Hawaiian Psychiatrists**  
Daniel L. Dickerson, D.O.

**Asian-American Psychiatrists**  
Jacquelyn B. Chang, M.D.

**Black Psychiatrists**  
Michele Reid, M.D.

**Gay, Lesbian, and Bisexual Issues**  
Ellen Haller, M.D.

**Hispanic Psychiatrists**  
Andres J. Pumariaga, M.D.

**International Medical Graduates**  
Marie C. Rigaud, M.D.

**Religion, Spirituality, and Psychiatry**  
James W. Lomax II, M.D.

**Women**  
Asha S. Mishra, M.D.

---

**Council on  
Psychiatry And Law**

Patricia R. Recupero,  
M.D., J.D.

**Confidentiality**  
William F. Haning, M.D.

**Isaac Ray Award**  
J. Richard Ciccone, M.D.

**Judicial Action**  
Jeffrey S. Janofsky, M.D.

**Manfred S. Guttmacher Award**  
Marilyn Price, M.D., C.M.

**Task Force on the Assessment of  
Violence Risk**  
Alec W. Buchanan, M.D.

**Task Force on Forensic Outpatient  
Services**  
Steven K. Hoge, M.D.

---

**Council on Psychosomatic  
Medicine**

Thomas N. Wise, M.D.

**Access to Care and Reimbursement**  
Donna T. Chen, M.D.

**Psychosomatic Education and Training**  
Mary Jane Massie, M.D.

**Psychosomatic Medicine Research**  
Joel Edward Dimsdale, M.D.

**Council on Quality Care**

Daniel K. Winstead, M.D.

**AIDS**  
Francisco Fernandez, M.D.

**Electronic Health Records**  
Laura J. Fochtmann, M.D.

**Patient Safety**  
Alfred Herzog, M.D.

**Prevention of Mental Disorders and  
Promotion of Mental Health**  
William Rigby Beardslee,  
M.D.

**Psychotherapy by Psychiatrists**  
Eric Martin Plakun, M.D.

**Quality Indicators**  
Karen Pierce, M.D.

**Standards and Survey Procedures**  
Jeanne L. Steiner, D.O.

**Steering Committee on Practice  
Guidelines**  
John S. McIntyre, M.D.

---

**Council on Research**

Jeffrey A. Lieberman, M.D.

**Electroconvulsive and Other  
Electromagnetic Therapies**  
William M. McDonald, M.D.

**Health Services Research**  
Javier I. Escobar, M.D.

**Prevention of Mental Disorders and  
Promotion of Mental Health**  
William R. Beardslee, M.D.

**Psychiatric Diagnosis  
and Assessment**  
Howard H. Goldman, M.D.

**Research Awards**  
Stuart C. Yudofsky, M.D.

**Research Ethics**  
Donna T. Chen, M.D.

**Research on Psychiatric Treatments**  
Jeffrey A. Lieberman, M.D.

**Research Training**  
Charles B. Nemeroff, M.D.

**Task Force on Complementary and  
Alternative Medicine**  
Marlene Picus Freeman,  
M.D.

**Task Force on DSM-V**  
David J. Kupfer, M.D.

---

**Council on Social Issues  
and Public Psychiatry**

Carl Compton Bell, M.D.

**Mental Healthcare for Veterans &  
Military Personnel & Their  
Families**  
Harold Stephen Kudler,  
M.D.

**Persons With Mental Illness in the  
Criminal Justice System**  
Roberta E. Stellman, M.D.

**Poverty, Homelessness,  
and Psychiatric Disorders**  
Ann L. Hackman, M.D.

**Psychiatric Services Achievement  
Awards**  
Beatrice M. Kovaszny, M.D.
