# Read *The American Journal of Psychiatry* Online

Activate your FREE online access—It's as easy as 1, 2, 3!

To begin activation, go to [ajp.psychiatryonline.org](http://ajp.psychiatryonline.org) and click **SUBSCRIBE**

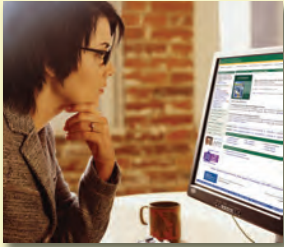

## For APA Members and Other Individuals:

1. Click on **ACTIVATE Your Member or Individual (Non-Member) Subscription**
2. Locate your 10-digit Member/Customer Number\* on your journal mailing label above your name. Be sure to enter all 10 digits, including any leading zeros.
3. Enter your number in the box and click **SUBMIT**.

On the next screen, you'll register your subscription and create a username and password that can be used immediately to access your online subscription.

\*If you are an APA Member, in most cases the number on your label will be your Member Number; if it is not, please enter your APA Member Number (with enough leading zeros to create 10 digits) instead of the number on your mailing label.

## For Institutions:

1. Click on **ACTIVATE Your Institutional Subscription**.
2. Locate your Customer Number on the journal mailing label above your name. Be sure to enter all 10-digits.
3. Enter your number in the box and click **SUBMIT**. On the next screen, you'll have the opportunity to enter IP addresses for your institution to provide seamless access for your patrons.

### Member/Customer Number

AJP 3000056866 CAR-RT LOT88 C-015  
John Q. Sample  
Mental Health Professional  
1000 Wilson Blvd STE 1825  
Arlington VA 22209-3924 01654

## Benefits of Online Activation

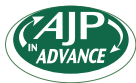

**AJP in Advance**—key research articles posted on the AJP website well in advance of their appearance in print.

**Back issue access to Volume 1, Issue 1**, starting with the *American Journal of Insanity* in 1844. (Available to institutions as a separate one-time purchase.)

**AJP CME**—interactive quizzes that offer *AMA PRA Category 1 Credits™* for selected articles from each issue (with paid subscription to the CME Course Program).

**AJP Audio**—MP3-format program summarizing findings from key articles from each issue.

**Residents' Journal**—the gateway to AJP articles and features that have most value to residents in their training.

**Precise and powerful searching** by author, keyword, and/or citation details—within any one journal, across the entire PsychiatryOnline journal collection, or across all HighWire journals.

**PubMed, CrossRef, and Google Scholar links**—from cited references to abstracts and full text; to similar articles; to other articles by the same lead authors.

**eTOCs**—Get advance email alerts with the table of contents from the latest issue.

For more information or if you cannot locate your customer number, please contact APPI Customer Service:  
Call: 1.800.368.5777 or 703.907.7322  
Email: [appi@psych.org](mailto:appi@psych.org)

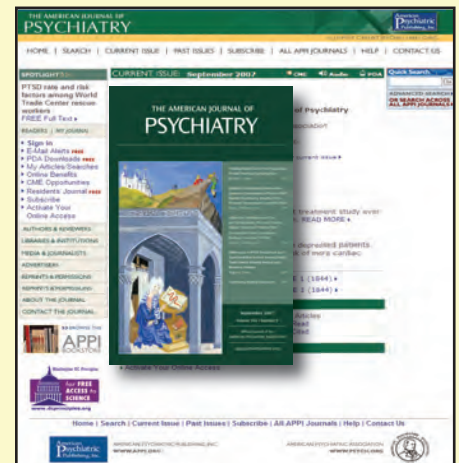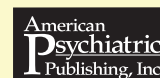

The First and Last Word in Psychiatry

AH810

# New Feature for Residents!

## *The American Journal of Psychiatry* Residents' Journal

A FREE electronic publication produced specifically for psychiatry residents

The Residents' Journal contains special links to full text of the articles from the current *American Journal of Psychiatry* and to AJP Audio, a downloadable MP3 file featuring highlights from the issue. In addition, this e-mail bulletin contains two exclusive features:

### Journal Club Kit

A featured article presented with an overview discussing the reasons for its selection, discussion questions, and an editorial by a senior member of the field placing the article into clinical context.

### Educational Article

Case presentation that illustrates a major point in clinical practice or highlights unique treatment approaches.

Plus lively contributions from your fellow residents:

- Instructive cases
- Unique clinical or educational programs
- Perspectives on training and career development
- Discussions arising from journal club discussions

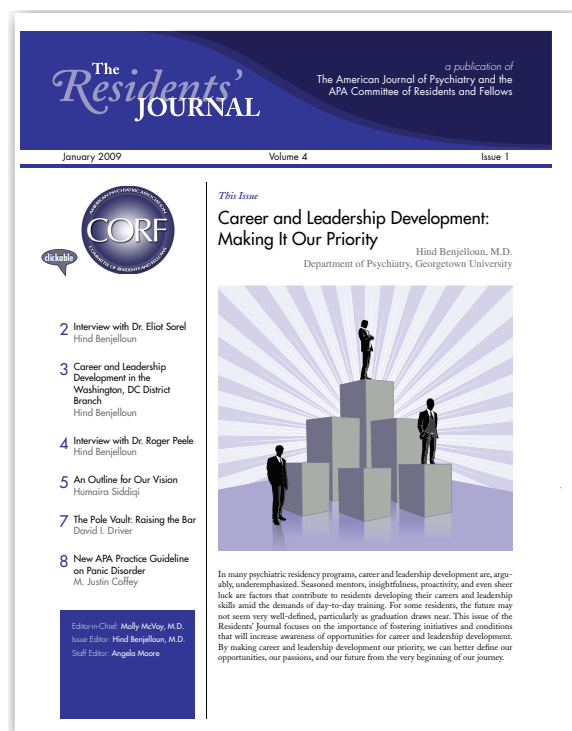

The Residents' Journal is sent free-of-charge to all psychiatry residents. Anyone interested in being included on the distribution list should contact Angela Moore, the Residents' Journal staff editor at [ajp@psych.org](mailto:ajp@psych.org) with "Subscribe to Residents' Journal" in the subject line.

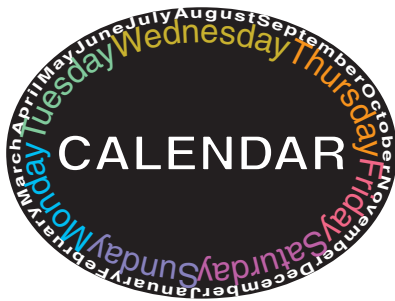

For free listing of your organization's official annual or regional meeting, please send us the following information: sponsor, location, inclusive dates, type and number of continuing education credits (if available), and the name, address, and telephone number of the person or group to contact for more information. In order for an event to appear in our listing, all notices and changes must be received at least 6 months in advance of the meeting and should be addressed to:

*Calendar, American Journal of Psychiatry, 1000 Wilson Boulevard, Suite 1825, Arlington, VA 22209-3901, jblair@psych.org (e-mail).*

*Because of space limitations, only listings of meetings of the greatest interest to Journal readers will be included.*

## FEBRUARY 2009

**February 18–22**, Annual Meeting of the American Neuropsychiatric Association (ANPA), San Antonio, TX. Contact: ANPA office; (614) 447-2077 (tel), (614) 263-4366 (fax), anpa@osu.edu (e-mail), www.anpaonline.org (web site).

**February 25–March 1**, American College of Psychiatrists Annual Meeting, Tucson, AZ. Contact: 122 South Michigan Avenue, Suite 1360, Chicago, IL 60603; (312) 662-1020 (tel), (312) 662-1025 (fax), angel@ACPsych.org (e-mail).

## MARCH

**March 5–8**, 22nd Annual Meeting of the American Association for Geriatric Psychiatry, Honolulu. Contact: AAGP, 7910 Woodmont Ave., Ste. 1050, Bethesda, MD 20814-3004; (301) 654-7850 (tel), (301) 654-4137 (fax), www.aagpmeeting.org (web site).

**March 27–29**, 3rd International Conference of The International Society of Interpersonal Psychotherapy (ISIPT), New York City, NY. Contact: 2009 ISIPT Planning Committee; hv2009@columbia.edu (e-mail).

## APRIL

**April 22–26**, Annual Meeting and Scientific Sessions of the Society of Behavioral Medicine, Montreal, Quebec. Contact: Society of Behavioral Medicine, (414) 918-3156 (tel), (414) 276-3349 (fax), info@sbm.org (e-mail).

## MAY

**May 15–17**, 5th International Conference on Alzheimer's Disease and Related Disorders in the Middle East, Limassol, Cyprus. Contact: Conference Secretariat; 1-773-784-8134 (tel), 1-773-782-6747 (tel), 1-208-575-5453 (fax), meet-

ings@worldeventsforum.com (e-mail), www.worldeventsforum.com/alz.htm (web site).

**May 16–21**, 162nd Annual Meeting of the American Psychiatric Association, San Francisco, CA. Contact: Cathy Nash, APA Annual Meetings Dept., 1000 Wilson Blvd., Ste. 1825, Arlington, VA 22209; (703) 907-7822.

## JUNE

**June 16–20**, 2nd Thematic Conference on Legal and Forensic Psychiatry, Madrid, Spain. Contact: World Psychiatric Association, Alfredo Calcedo Barba, forensicpsychiatry2009@gmail.com.

## AUGUST

**August 27–30**, Canadian Psychiatric Association 59th Annual Meeting, St. Johns, Newfoundland, Canada. Contact: 260-441 MacLaren Street, Ottawa, ON K2P 2H3, Canada; (800) 267-1555 (tel), (613) 234-9857 (fax), conferene@cpa-apc.org (e-mail), www.cpa-apc.org (web site).

## OCTOBER

**October 8–11**, 61st Institute on Psychiatric Services, American Psychiatric Association, New York, NY. Contact: Jill Gruber, APA Annual Meetings Dept., 1000 Wilson Blvd., Ste. 1825, Arlington, VA 22209; (703) 907-7815.

**October 27–November 1**, 56th Annual Meeting of the American Academy of Child and Adolescent Psychiatry, Honolulu, HI. Contact: AACAP, 3615 Wisconsin Avenue, N.W., Washington, DC 20016-3007; (202) 966-7300 (tel), (202) 966-2891 (fax), meetings@aacap.org (e-mail), www.aacap.org (web site).

## MAY 2010

**May 22–27**, 163rd Annual Meeting of the American Psychiatric Association, New Orleans, LA. Contact: Cathy Nash, APA Annual Meetings Dept., 1000 Wilson Blvd., Ste. 1825, Arlington, VA 22209; (703) 907-7822.

## OCTOBER

**October 14–17**, 62nd Institute on Psychiatric Services, American Psychiatric Association, Boston, MA. Contact: Jill Gruber, APA Annual Meetings Dept., 1000 Wilson Blvd., Ste. 1825, Arlington, VA 22209; (703) 907-7815.

**October 14–17**, 57th Annual Meeting of the American Academy of Child and Adolescent Psychiatry, Boston, MA. Contact: AACAP, 3615 Wisconsin Avenue, N.W., Washington, DC 20016-3007; (202) 966-7300 (tel), (202) 966-2891 (fax), meetings@aacap.org (e-mail), www.aacap.org (web site).

## MAY 2011

**May 14–19**, 164th Annual Meeting of the American Psychiatric Association, Honolulu, HI. Contact: Cathy Nash, APA Annual Meetings Dept., 1000 Wilson Blvd., Ste. 1825, Arlington, VA 22209; (703) 907-7822.

## OCTOBER

**October 18–23**, 58th Annual Meeting of the American Academy of Child and Adolescent Psychiatry, Toronto, Ontario. Contact: AACAP, 3615 Wisconsin Avenue, N.W., Washington, DC 20016-3007; (202) 966-7300 (tel), (202) 966-2891 (fax), meetings@aacap.org (e-mail), www.aacap.org (web site).

*Continued on page A15*

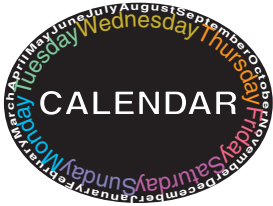

Continued from page A12

**October 27–30**, 63rd Institute on Psychiatric Services, American Psychiatric Association, San Francisco, CA. Contact: Jill Gruber, APA Annual Meetings Dept., 1000 Wilson Blvd., Ste. 1825, Arlington, VA 22209; (703) 907-7815.

### Continuing Medical Education

Three articles in each issue provide an opportunity to earn up to 1 hour category 1 **CME** credit each by taking a course covering the content. Credit available online only with purchased subscription to AJP's CME program. Visit [cme.psychiatryonline.org](http://cme.psychiatryonline.org) for details.

### FREE AUDIO! Have You Heard?

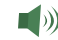

You can listen to highlights of *The American Journal of Psychiatry* by downloading a monthly free .mp3 audio file from our website (<http://ajp.psychiatryonline.org/misc/audio.dtl>) or by subscribing to the AJP Audio podcast at iTunes or other feed reader.

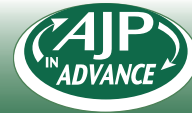

### GET AHEAD!

Subscribers can now view PDFs of all new research articles before print publication by clicking on the "AJP in Advance" logo at the AJP website ([ajp.psychiatryonline.org](http://ajp.psychiatryonline.org)).

## Coming in the March 2009 issue\*

### THE AMERICAN JOURNAL OF PSYCHIATRY

#### *Anticipatory Activation in the Amygdala and Anterior Cingulate in Generalized Anxiety Disorder and Prediction of Treatment Response*

J.B. Nitschke, I. Sarinopoulos, D.J. Oathes, T. Johnstone, P.J. Whalen, R.J. Davidson, and N.H. Kalin

#### *Transdiagnostic Cognitive-Behavioral Therapy for Patients With Eating Disorders: A Two-Site Trial With 60-Week Follow-Up*

C.G. Fairburn, Z. Cooper, H.A. Doll, M.E. O'Connor, K. Bohn, D.M. Hawker, J.A. Wales, and R.L. Palmer

#### *Selective Serotonin Reuptake Inhibitor Use and Risk of Gestational Hypertension*

Sengwee Toh, A.A. Mitchell, C. Louik, M.M. Werler, C.D. Chambers, and S. Hernández-Díaz

#### *Obsessions and Compulsions in the Community: Prevalence, Interference, Help-Seeking, Developmental Stability and Co-Occurring Psychiatric Conditions*

M.A. Fullana, D. Mataix-Cols, A. Caspi, H. Harrington, J.R. Grisham, T.E. Moffitt, and R. Poulton

\*Can't wait? Visit [ajp.psychiatryonline.org](http://ajp.psychiatryonline.org) and click the "AJP in Advance" logo to see all articles uploaded in advance of print!

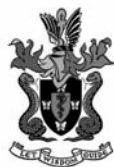

# THE BRITISH JOURNAL OF PSYCHIATRY

January 2009, VOL. 194

|                       |                                                                                                                                                                         |                     |                                                                                                                                      |
|-----------------------|-------------------------------------------------------------------------------------------------------------------------------------------------------------------------|---------------------|--------------------------------------------------------------------------------------------------------------------------------------|
| A1                    | <b>Editorial Board</b>                                                                                                                                                  | 49                  | <b>Patients' views and readmissions 1 year after involuntary hospitalisation</b>                                                     |
| A3                    | <b>Highlights of this issue</b>                                                                                                                                         |                     | S. Priebe, C. Katsakou, T. Amos, M. Leese, R. Morriss, D. Rose, T. Wykes, and K. Yeeles                                              |
| <b>Editorial</b>      |                                                                                                                                                                         |                     |                                                                                                                                      |
| 1                     | <b>Antidepressants on trial: how valid is the evidence?</b>                                                                                                             | 55                  | <b>Developing a care pathway for advance decisions and powers of attorney: qualitative study</b>                                     |
|                       | G. Parker                                                                                                                                                               |                     | J.I. Bisson, V. Hampton, A. Rosser, and S. Holm                                                                                      |
| 3                     | <b><i>I have a very wonderful love in me</i> by Abdullah Jojo Peter – psychiatry in pictures</b>                                                                        | 61                  | <b><i>Knees For Kate</i> – poems by doctors</b>                                                                                      |
|                       | Researched by Jim Crabb                                                                                                                                                 |                     | Stephen Wilson                                                                                                                       |
| <b>Review article</b> |                                                                                                                                                                         | 62                  | <b>Psychopathy traits in adolescents with childhood attention-deficit hyperactivity disorder</b>                                     |
| 4                     | <b>Lamotrigine for treatment of bipolar depression: independent meta-analysis and meta-regression of individual patient data from five randomised trials</b>            |                     | T. Fowler, K. Langley, F. Rice, N. Whittinger, K. Ross, S. van Goozen, M.J. Owen, M.C. O'Donovan, M.B.M. van den Bree, and A. Thapar |
|                       | J.R. Geddes, J.R. Calabrese, and G.M. Goodwin                                                                                                                           | 67                  | <b><i>The System of Dr Tarr and Professor Fether</i> (1845) Edgar Allan Poe – psychiatrists in 19th-century fiction</b>              |
| <b>Papers</b>         |                                                                                                                                                                         |                     | Fiona Subotsky                                                                                                                       |
| 10                    | <b>Excess mortality, causes of death and prognostic factors in anorexia nervosa</b>                                                                                     | 68                  | <b>Self-harm in adolescents: self-report survey in schools in Scotland</b>                                                           |
|                       | F.C. Papadopoulos, A. Ekblom, L. Brandt, and L. Ekselius                                                                                                                |                     | R.C. O'Connor, S. Rasmussen, J. Miles, and K. Hawton                                                                                 |
| 18                    | <b>Beyond the critical period: longitudinal study of 8-year outcome in first-episode non-affective psychosis</b>                                                        | 73                  | <b>Repetition of acute poisoning in Oslo: 1-year prospective study</b>                                                               |
|                       | N. Crumlish, P. Whitty, M. Clarke, S. Browne, M. Kamali, M. Gervin, O. McTigue, A. Kinsella, J.L. Waddington, C. Larkin, and E. O'Callaghan                             |                     | F. Heyerdahl, M.A. Bjornaas, R. Dahl, K.E. Hovda, A. K. Nore, O. Ekeberg, and D. Jacobsen                                            |
| 25                    | <b>Neural correlates of executive function and working memory in the 'at-risk mental state'</b>                                                                         | 80                  | <b>Effect of 7 July 2005 terrorist attacks in London on suicide in England and Wales</b>                                             |
|                       | M.R. Broome, P. Matthiasson, P. Fusar-Poli, J.B. Woolley, L.C. Johns, P. Tabraham, E. Bramon, L. Valmaggia, S.C.R. Williams, M.J. Brammer, X. Chitnis, and P.K. McGuire |                     | E. Salib and M. Cortina-Borja                                                                                                        |
| 33                    | <b>Was the scoundrel (<i>belial</i>) of the Book of Proverbs a psychopath? – psychiatry in the Old Testament</b>                                                        | 85                  | <b>Psychiatry and the pharmaceutical industry – in 100 words</b>                                                                     |
|                       | George Stein                                                                                                                                                            |                     | David Healy                                                                                                                          |
| 34                    | <b>Diagnostic accuracy of <sup>123</sup>I-FP-CIT SPECT in possible dementia with Lewy bodies</b>                                                                        | <b>Short report</b> |                                                                                                                                      |
|                       | J.T. O'Brien, I.G. McKeith, Z. Walker, K. Tatsch, J. Booij, J. Darcourt, M. Marquardt, and C. Reiningger for the DLB Study Group                                        | 86                  | <b>Family participation in treatment, post-discharge appointment and medication adherence at a Nigerian psychiatric hospital</b>     |
| 40                    | <b>Aripiprazole monotherapy in acute mania: 12-week, randomised placebo- and haloperidol-controlled study</b>                                                           |                     | A.B. Adeponle, B.D. Thombs, M.L. Adelekan, and L.J. Kirmayer                                                                         |
|                       | A.H. Young, D.A. Oren, A. Lowy, R.D. McQuade, R.N. Marcus, W.H. Carson, N.H. Spiller, A.F. Torbeyns, and R. Sanchez                                                     | <b>Columns</b>      |                                                                                                                                      |
|                       |                                                                                                                                                                         | 88                  | <b>Correspondence</b>                                                                                                                |
|                       |                                                                                                                                                                         | 90                  | <b>Correction</b>                                                                                                                    |
|                       |                                                                                                                                                                         | 91                  | <b>Book reviews</b>                                                                                                                  |
|                       |                                                                                                                                                                         | 98                  | <b>Contents of <i>Advances in Psychiatric Treatment</i></b>                                                                          |
|                       |                                                                                                                                                                         | 99                  | <b>Contents of the <i>American Journal of Psychiatry</i></b>                                                                         |
|                       |                                                                                                                                                                         | 100                 | <b>From the Editor's desk</b>                                                                                                        |
